1 **DECOMPOSING PARASITE FITNESS IN A TWO-HOST, TWO-PARASITE SYSTEM REVEALS THE**  
2 **UNDERPINNINGS OF PARASITE SPECIALIZATION**

3 Eva J. P. Lievens<sup>1,2,\*</sup>, Julie Perreau<sup>1</sup>, Philip Agnew<sup>2</sup>, Yannis Michalakis<sup>2,†</sup> and Thomas  
4 Lenormand<sup>1,†</sup>

5 <sup>1</sup>UMR 5175 CEFE, CNRS–Université de Montpellier–Université P. Valéry–EPHE, 1919  
6 Route de Mende, 34293 Montpellier Cedex 5, France

7 <sup>2</sup>UMR 5290 MIVEGEC, CNRS–IRD–Université de Montpellier, 911 Avenue Agropolis BP  
8 64501, 34394 Montpellier Cedex 5, France

9 †equal contribution

10 \*corresponding author (eva.j.lievens@gmail.com)

11 **ABSTRACT**

12 The ecological specialization of parasites – whether they can obtain high fitness on very few  
13 or very many different host species – is a determining feature of their ecology. In order to  
14 properly assess specialization, it is imperative to measure parasite fitness across host species;  
15 to understand its origins, fitness must be decomposed into the underlying traits. Despite the  
16 omnipresence of parasites with multiple hosts, very few studies assess and decompose their  
17 specialization in this way. To bridge this gap, we quantified the infectivity, virulence, and  
18 transmission rate of two parasites, the horizontally transmitted microsporidians  
19 *Anostracospora rigaudi* and *Enterocytoospora artemiae*, in their natural hosts, the brine  
20 shrimp *Artemia parthenogenetica* and *Artemia franciscana*. Our results demonstrate that each  
21 parasite performs well on one of the two host species (*A. rigaudi* on *A. parthenogenetica*, and  
22 *E. artemiae* on *A. franciscana*), and poorly on the other. This partial specialization is driven  
23 by high infectivity and transmission rates in the preferred host, and is associated with  
24 maladaptive virulence and large costs of resistance in the other. Our study represents a rare  
25 empirical contribution to the study of parasite evolution in multi-host systems, highlighting  
26 the negative effects of under- and over-exploitation when adapting to multiple hosts.

27 **KEYWORDS**

28 Ecological specialization, Host specificity, Parasite fitness, Parasite life history, Multi-host,  
29 Multi-parasite, Fecundity compensation, Resistance, Microsporidians, *Artemia*

## 30 INTRODUCTION

31 Life in a variable environment imposes an evolutionary choice between specializing to  
32 certain habitats and remaining a generalist. This dilemma is particularly pressing for parasitic  
33 species, which often come into contact with a wide range of potential habitats (i.e.  
34 hosts). Evolving an optimal level of specialization is not trivial, as adaptation to one host may  
35 come at the expense of adaptation to another (Levins 1968, Kawecki 1994, Kassen 2002).  
36 Furthermore, the degree of specialization affects the ecology and future evolution of the  
37 parasite: generalist parasites are more likely to survive perturbations in the host community  
38 and to colonize new hosts (Cleaveland et al. 2001, Agosta et al. 2010), while specialist  
39 parasites are more likely to interact tightly with their hosts (Kawecki 1998). The degree of  
40 specialization, therefore, is a key trait of parasite species. It varies widely among species –  
41 even within clades, parasites can range from extremely specific (infecting only one host  
42 species) to widely generalist (infecting tens of host species) (Poulin and Keeney 2008) – and  
43 through time – many parasites can evolve from generalism to specialism or vice-versa when  
44 conditions change (e.g. Desdevises et al. 2002, Tanaka et al. 2007, Johnson et al. 2009,  
45 Cenzler 2016).

46 Thus, assessing how specialized multi-host parasites are, and to which hosts, is an essential  
47 step to understanding and controlling the epidemiology and evolution of multi-host parasites.  
48 To this end, the ‘ecological specialization’ of parasites should be distinguished from the  
49 standard concepts ‘host range’ and ‘host specificity’ (sensu Lymbery 1989). Neither host  
50 range – the number of host species in which a parasite occurs – nor host specificity – host  
51 range weighted by infection intensity or host phylogeny – account for the existence of host  
52 species that barely contribute to the parasite’s transmission. Such ‘spillover’ hosts (sensu  
53 Fenton et al. 2015) can readily become infected, but do not transmit the parasite enough to

54 keep its population growth rate above one. As a consequence, infection in the spillover hosts  
55 quickly dies out if there is no replenishing transmission from suitable hosts (“dead-end” and  
56 “stuttering chain” dynamics, Viana et al. 2014). In essence, these are ecological source-sink  
57 dynamics. Ecological specialization can take these dynamics into account: it is based on  
58 niche breadth (Futuyma and Moreno 1988), and sink habitats fall outside the fundamental  
59 niche (Pulliam 1988). Classifying organisms as ecological generalists or specialists means  
60 studying the variation in their fitness across a range of environments (Kassen 2002). Applied  
61 to parasites, this means their fitness must be assessed in all the affected host species. Such  
62 assessments typically require detailed epidemiological models (e.g. Rhodes et al. 1998,  
63 Fenton et al. 2015) or sizeable experiments (Jaenike and Dombeck 1998, Ahonen et al. 2006,  
64 Auld et al. 2017).

65 A second step is to understand why parasite fitness varies across hosts. The fitness of  
66 infections emerges from a suite of parasite- and host-determined traits, including infectivity,  
67 exploitation of host resources, virulence, immune evasion, and transmission success. The  
68 nature of these traits has important consequences for a parasite: evolutionary constraints can  
69 emerge from functional correlations between traits within a host species (Walther and Ewald  
70 2004, Alizon et al. 2009, Alizon and Michalakis 2015, Hall et al. 2017), or from correlations  
71 between the same trait in different host species (Futuyma and Moreno 1988, Via and  
72 Hawthorne 2002). They also determine the source of the parasite’s maladaptation to spillover  
73 hosts (Woolhouse et al. 2001). This has been best studied with regards to virulence and  
74 transmission, mostly in single-host systems (e.g. Dwyer et al. 1990, Fraser et al. 2007, de  
75 Roode et al. 2008, Doumayrou et al. 2012). Studies that decompose the fitness of multi-host  
76 parasites into component traits are very rare (reviewed in Rigaud et al. 2010)(Agudelo-  
77 Romero et al. 2008, Auld et al. 2017).

78 Here, we examine specialization and its component traits in a natural multi-host, multi-  
79 parasite system. In the saltern of Aigues-Mortes, France, two species of brine shrimp occur in  
80 sympatry: a native parthenogenetic clade, *Artemia parthenogenetica*, and an introduced  
81 sexual species, *Artemia franciscana* (Amat et al. 2005). Both *Artemia* species are parasitized  
82 by the microsporidians *Anostracospora rigaudi* and *Enterocytozoa artemiae*. These  
83 parasites infect the gut epithelium, transmitting infection horizontally through spores released  
84 with the faeces (Rode et al. 2013b, 2013a). Since the saltern lacks spatial structure (Nougué  
85 et al. 2015), the pool of microsporidian spores is shared between *A. franciscana* and *A.*  
86 *parthenogenetica* (cf. Fels 2006). Although the rates of inter-specific transmission should  
87 therefore be high, and both *A. rigaudi* and *E. artemiae* commonly infect either host species,  
88 the two microsporidians appear to be somewhat specialized: *A. rigaudi* is always more  
89 prevalent in *A. parthenogenetica*, and is also dependent on this species to maintain itself in  
90 the host community; in contrast, *E. artemiae* is consistently more infectious to and more  
91 prevalent in *A. franciscana* (Lievens et al. *subm.*). Historically, the association of *A.*  
92 *parthenogenetica* and *A. rigaudi* predates the introduction of *A. franciscana* (in 1970, Rode et  
93 al. 2013c), while *A. franciscana* is also infected by *E. artemiae* in its native range (Rode et al.  
94 2013c). It is not known whether *E. artemiae* was also present in France before the  
95 introduction of *A. franciscana*, whether it was co-introduced, or whether it arrived  
96 independently afterwards.

97 We evaluated parasite specialization in this system by studying the infectivity, virulence, and  
98 transmission of *A. rigaudi* and *E. artemiae* in each of their hosts. We confirm experimentally  
99 that while both microsporidians can complete their life cycle in the two host species, neither  
100 is a complete generalist. Rather, *A. rigaudi* is largely specialized on *A. parthenogenetica*,  
101 while *E. artemiae* is largely specialized on *A. franciscana*. Further, we show that the lower  
102 fitness of the two parasites in their non-specialized hosts was caused by a reduction in

103 infectivity and transmission rate (in both cases), combined with a suboptimal degree of  
104 virulence (too low for *E. artemiae*; too high for *A. rigaudi*). This demonstrates that a  
105 successful calibration of host exploitation and parasite virulence is central to the  
106 specialization of multi-host parasites.

## 107 **METHODS**

108 We performed two experiments to investigate the life history and virulence of the  
109 microsporidians *A. rigaudi* and *E. artemiae* in their *Artemia* hosts. First, we used dose-  
110 response tests to quantify infectivity in each host-parasite combination. Second, we did a  
111 large-scale experimental infection experiment, tracking host growth, mortality, and  
112 reproduction, as well as parasite transmission, over a period of two months. These results  
113 allowed us to estimate the virulence and fitness of each parasite on each host.

### 114 **Experimental conditions**

115 The *Artemia* used in both experiments were raised in the lab in parasite-free conditions. *A.*  
116 *franciscana* were hatched from dormant cysts sampled from the saltern of Aigues-Mortes,  
117 France, and stored in dry conditions at 4 °C. We used three batches of cysts, sampled at the  
118 sites Caitive Nord or Caitive Sud in October 2013 or 2014. Cysts were hatched following the  
119 protocol described by Lievens et al. (2016). *A. parthenogenetica* were collected as live larvae  
120 from a mix of clones. The *A. parthenogenetica* clones were started by females collected in  
121 Aigues-Mortes, who were allowed to multiply and produce cysts in the lab; those cysts were  
122 then hatched to produce parasite-free stock lines. All *Artemia* were maintained at  $23 \pm 1$  °C,  
123 in a parasite-free 90 ppt saline medium produced by diluting concentrated, autoclaved brine  
124 (Camargue Pêche, France) with deionized water. *Artemia* were fed *ad libitum* with freeze-  
125 dried microalgae (*Tetraselmis chuii*, Fitoplankton marino, Spain) dissolved in deionized

126 water. Experimental conditions matched the cultivation conditions, except that feeding was  
127 regulated (see below).

128 We created stocks of *A. rigaudi* and *E. artemiae* for use in the experiment by combining  
129 infected *Artemia* from various sites in Aigues-Mortes between October 2014 and March  
130 2015. We added new infected hosts to the stocks whenever we found field populations that  
131 were heavily infected with either *A. rigaudi* or *E. artemiae*. We also regularly added  
132 uninfected, lab-bred *Artemia* to help maintain the infection. We selected both infected *A.*  
133 *franciscana* and infected *A. parthenogenetica* from the field, and maintained each stock  
134 population on a mix of *A. franciscana* and *A. parthenogenetica* hosts ( $n_{\text{hosts}}$  at any given  
135 time  $\approx$  20–50 per microsporidian species). Thus, our stocks contained a mix of spores from  
136 different field sites and times, collected from and propagated on both host species.

### 137 **Spore collection and quantification**

138 To produce the inocula for Experiments 1 and 2, we collected spores from the lab stocks of *A.*  
139 *rigaudi* and *E. artemiae* described above. The stock hosts were kept in large separating  
140 funnels, so that their feces (containing spores) settled down into the funnel's tube and could  
141 be collected easily. For our experiments, we collected feces produced over 20-hour periods  
142 (feces suspended in  $\sim$ 15 mL). Because fecal aggregates can trap spores and skew  
143 concentration estimates, we homogenized the fecal solutions by dividing them into 1.2 mL  
144 Qiagen Collection Microtubes, adding two 4 mm stainless steel beads to each tube, and  
145 shaking them at 30 Hz for 30 s. Once homogenized, the fecal solutions were recombined to  
146 their original volume. To quantify the spore concentration in the fecal solutions, we took 1  
147 mL subsamples and added 10  $\mu$ L 1X Calcofluor White Stain (18909 Sigma-Aldrich, USA) to  
148 each. After staining for 10 min, we rinsed the subsamples by centrifuging them for 8 min at  
149 10000 g, replacing 910  $\mu$ L of the supernate with 900  $\mu$ L deionized water and vortexing well.

150 We then concentrated the subsamples to 20X by repeating the centrifugation step and  
151 removing 950  $\mu$ L of the supernate. Finally, we estimated the concentration by counting the  
152 number of spores in 0.1  $\mu$ L on a Quick Read counting slide (Dominique Dutscher) under a  
153 Zeiss AX10 fluorescence microscope (10x 40x magnification; excitation at 365 nm; Zeiss  
154 filter set: 62 HE BFP + GFP + HcRed shift free (E)). We repeated the counts twice (for  
155 Experiment 2) or thrice (for Experiment 1); the spore concentration per  $\mu$ L in the  
156 unconcentrated fecal solutions was then equal to (mean of the spore counts\*10)/20. Finally,  
157 we added 90 ppt clean saline medium to the homogenized fecal solutions until the correct  
158 concentration for inoculation was reached.

## 159 **Experiment 1: Infectivity**

### 160 *Experimental design and execution*

161 Previous papers studied the infectivity of *A. rigaudi* and *E. artemiae* using single,  
162 uncontrolled spore doses (Lievens et al. subm., Rode et al. 2013a). Here, we quantified  
163 infectivity more precisely by exposing individual *A. parthenogenetica* and *A. franciscana* to a  
164 range of controlled spore doses and measuring the proportion of infected individuals.

165 We exposed experimental hosts to doses of 0, 400, 800, 1 600, 3 200 and 6 400 spores per  
166 individual. To ensure hosts ingested all spores, each host was first exposed in a highly-  
167 concentrated medium: individuals were placed in 2 mL Eppendorf tubes with 0.45 mL spore  
168 solution, 1 mL extra brine and 0.25 mL algal solution ( $3.4 \cdot 10^9$  *T. chuii* cells/L deionized  
169 water). After two days, hosts were transferred to 40 mL glasses containing 20 mL brine and  
170 the infection was allowed to incubate for three more days; hosts were fed a total of 1 mL  
171 algal solution over the three days. Surviving hosts were then sacrificed and tested for the  
172 presence of *A. rigaudi* or *E. artemiae* by PCR (following Rode et al. 2013a). Treatments were  
173 replicated 20 times, except when spore availability was limiting (*E. rigaudi* on *A.*



174 *parthenogenetica*: 16, 8 and 4 replicates for the doses 400, 3200 and 6400 spores per  
175 individual, respectively). All hosts were ~4 weeks old and measured between 5 and 8 mm; *A.*  
176 *franciscana* hosts were mixed males and females.

### 177 *Statistical analyses*

178 To analyze the dose-response curves, we used four-parameter log-logistic modeling in R  
179 (package drc, Ritz and Strebig 2005, R Core Team 2014). In these models, the four  
180 parameters determining the shape of the sigmoidal curve are: the lower limit (set to 0 in our  
181 case), the upper limit, the slope around the point of inflection, and the point of inflection  
182 (which here is the same as the ED<sub>50</sub>). The (binomial) response variable was the number of  
183 individuals that were infected vs. uninfected. Because we did not perform the *A.*  
184 *parthenogenetica* and *A. franciscana* experiments at the same time, we could not control for  
185 environmental effects. Thus, we simply tested if the dose-response curves for *A. rigaudi* and  
186 *E. artemiae* were different within each host species. To do this, we fit models that did or did  
187 not include a ‘microsporidian species’ effect and compared the two using a likelihood ratio  
188 test. If the effect was significant, we went on to compare the parameters of the two resulting  
189 curves (‘compParm’ function in the drc package).

## 190 **Experiment 2: Virulence and transmission**

### 191 *Experimental design and execution*

192 To quantify the virulence and transmission rates of *A. rigaudi* and *E. artemiae*, we  
193 experimentally infected individual *Artemia* with controlled spore doses. We then tracked their  
194 survival, growth, reproductive output, and spore production over a two-month period. We  
195 also quantified host-to-host transmission at two time points.

196 *A. franciscana* males, *A. franciscana* females, and *A. parthenogenetica* females were divided  
197 into three treatments: ‘Controls’, ‘Exposure to *A. rigaudi*’, and ‘Exposure to *E. artemiae*’,  
198 which were replicated as permitted by spore and host availability (Table 1). *A. franciscana*  
199 hosts were subdivided into three blocks, determined by their origin: Cative Nord 2013,  
200 Cative Nord 2014, or Cative Sud 2014. *A. parthenogenetica* hosts were subdivided into two  
201 blocks, determined by the age of their batch:  $34 \pm 2$  or  $26 \pm 2$  days (because the relative  
202 contribution of the different clones to the batches was not controlled, the genotype  
203 frequencies of these groups could differ). All hosts were subadults (adult body plan but  
204 sexually immature). All *A. franciscana* were aged  $38 \pm 1$  days and measured 4.5 or 5.0 mm;  
205 *A. parthenogenetica* measured 6.5, 7.0 or 7.5 mm. Size classes were evenly distributed across  
206 blocks and treatments.

207 We exposed experimental hosts to spore doses designed to be comparable while maximizing  
208 infection rate (see results of Experiment 1): 3000 spores/individual for *A. rigaudi* and 2500  
209 spores/individual for *E. artemiae*. Because *A. parthenogenetica* had low infection rates with  
210 *E. artemiae*, a separate set of *A. parthenogenetica* was infected with 10000 *E. artemiae*  
211 spores per individual (Table 1). To ensure hosts ingested all spores, each host was exposed in  
212 a highly-concentrated medium over a two-day period: individuals were placed in 2 mL  
213 Eppendorf tubes with 0.37 mL spore solution and 1.25 mL brine containing  $2.6 \times 10^6$  *T. chuii*  
214 cells.

215 After exposure (= on day 1 of the experiment), individuals were transferred to open tubes,  
216 which rested upright in 40 mL plastic cups containing 20 mL of brine. The lower end of the  
217 tube was fitted with a 1x1 mm net. The netting prevented experimental (adult) individuals  
218 from swimming to the bottom of the cup, while allowing spores, feces, and offspring to pass  
219 through; this limited secondary infections from a host’s own feces. Cups were randomly  
220 placed in trays, which were routinely rotated to standardize effects of room placement. Water

221 was changed every five days. Hosts were fed 0.5 mL algal solution daily ( $2.6 \times 10^9$  *T. chuii*  
222 cells/L deionized water); this feeding regime corresponds to half of the maximum ingestion  
223 rate of an adult *Artemia* (Reeve 1963) and has been shown to reveal energetic trade-offs  
224 (Rode et al. 2011). We ended our experiment after 60 days, at which point surviving  
225 individuals were sacrificed and tested for infection by PCR (following Rode et al. 2013a).

226 To quantify the effects of infection on the hosts, we tracked the growth, survival, and  
227 reproduction of the experimental individuals. Body length was recorded on days 30 and 60.  
228 Survival was recorded daily; dead individuals were tested for infection by PCR (following  
229 Rode et al. 2013a). We did not track reproduction for males, because male reproductive  
230 success is heavily influenced by the female partner (e.g. female clutch size). For females,  
231 measures of reproductive success were recorded daily, including date of sexual maturity (first  
232 detection of a fully-formed ovisac or of yolk accumulation in oocytes, Metalli and Ballardin  
233 1970), clutch date, clutch type, and clutch size. *Artemia* females are iteroparous, producing  
234 on average one clutch per five days (Bowen 1962, Metalli and Ballardin 1970). Clutches may  
235 be of two types: live larvae ('nauplii'), or dormant encysted embryos ('cysts'). Neonatal  
236 nauplii are barely visible to the eye and have high death rates. For ease of measurement,  
237 therefore, clutches of nauplii were counted five days after sighting. During these five days  
238 nauplii were in competition for resources with their mother (plus an additional male if *A.*  
239 *franciscana*, see below). However, mothers were removed at each water change, which could  
240 happen before the clutch had reached the five-day mark. In these cases, we placed a new tube  
241 containing one (or two, if *A. franciscana*) adult male *Artemia* above the nauplii to ensure the  
242 same level of food competition.

243 While *A. parthenogenetica* females reproduce in isolation, *A. franciscana* females need to be  
244 fertilized before each clutch (Bowen 1962). We therefore added mature *A. franciscana* males  
245 from parasite-free lab stocks to each tube containing an *A. franciscana* female. To prevent

246 cross-contamination between the male and the female, exposed males were removed and new  
247 uninfected males added every five days (five-day estimate based on infection detection time  
248 as found by Rode et al. 2013a). Male *Artemia* mate-guard by clasping females around the  
249 abdomen (Bowen 1962), and forcible removal may be harmful to both partners. To avoid  
250 this, males found mate-guarding on the fifth day were given up to two extra days with the  
251 female, after which they were forcibly removed. Couples were fed twice the individual food  
252 allocation.

253 To estimate parasite fitness, we estimated spore production at regular points throughout the  
254 experiment. To do this, we collected 1 mL of feces (containing parasite spores) from every  
255 experimentally infected host at every water change. Samples were stored in 1.2 mL Qiagen  
256 Collection Microtubes and refrigerated until the spore concentration could be quantified. To  
257 measure the spore concentration, we homogenized and stained each sample as described  
258 above, with minor differences in the centrifugation steps (16 min at 5000 g) and the final  
259 concentration (concentrated to 14.3X by removing 930  $\mu$ L of the supernate). Spores were  
260 counted once per sample, as described above. Because counting spores is labor-intensive, we  
261 restricted our efforts to the feces samples collected on days 15, 30, 45 and 60.

262 We also investigated the host-to-host transmission success of the parasites and its relation to  
263 spore production. On days 30 and 60, we allowed a subset of experimental hosts (hereafter  
264 the ‘donors’) to infect groups of uninfected ‘recipient’ hosts for 24 hours. Donors were first  
265 placed with either eight *A. franciscana* or eight *A. parthenogenetica* recipients; after 24  
266 hours, the donor was removed and placed with a new group of recipients of the other species.  
267 All recipient hosts were taken at random from uninfected lab stocks of varying ages and sizes  
268 (min=4 mm, max=10 mm). The donor host was separated from the recipients by a 1x1 mm  
269 net; recipients swam underneath them in 40 mL of brine. Infection was allowed to incubate in  
270 the recipients for six days after the donor was removed; surviving recipients were then

271 sacrificed and PCR-tested for infection (following Rode et al. 2013a). The prevalence of  
272 infection in recipient individuals could then be compared to the number of spores counted in  
273 the feces samples on day 30 or 60.

274 A key aspect of infection follow-up experiments is knowing which individuals were infected  
275 after exposure to the parasite, and which were not. In our experiment, testing by PCR was  
276 often not sufficient to determine if an individual was infected, because individuals that died  
277 before day 60 often had quickly decaying corpses and thus degraded DNA. We therefore  
278 considered that an individual was infected if it tested positive by PCR or produced spores or  
279 transmitted the infection to a recipient host. If none of these requirements were met, we  
280 considered that the individual was not infected. By applying these criteria, we could be sure  
281 of the infection status for almost all individuals that died on or after day 15 (the first spore  
282 collection date); for any individuals who died before day 15 and who tested negative by PCR,  
283 we could not exclude the possibility that they were infected.

#### 284 *Statistical analyses: virulence & transmission*

285 We analyzed the results of this experiment in two major parts. First, we examined the  
286 virulence of infections (effect of the parasite on host survival, growth, reproduction, and  
287 overall fitness). In these analyses, we excluded all individuals that did not become infected  
288 after exposure to the parasite. We also excluded all individuals that died before day 15 (we  
289 could not be certain of infection status before this day, see above). To make sure that we were  
290 not missing important events occurring before this cutoff, we repeated all statistical models  
291 for exposed vs. control individuals that died before day 15. Second, we analyzed parasite  
292 transmission (spore production rate, infectiousness, and overall fitness). An overview of the  
293 analyses is given in Table 2; a detailed description can be found in the Supplementary  
294 Material. Below, we describe only those response variables that are not intuitive.

295 Analyses were run in R version 3.4.2 (R Core Team 2014) using the packages lme4 (linear  
296 mixed models, Bates et al. 2015), survival (survival analyses, Therneau 2014), pscl (hurdle  
297 models, Zeileis et al. 2008), and multcomp (function “glht” for post-hoc testing, Hothorn et al.  
298 2008).

299 To estimate the infectiousness of a single spore, we used the results of the transmission assay.  
300 We assumed that the establishment of microsporidian infections follows an independent-  
301 action model with birth-death processes. This model assumes that a parasite population grows  
302 in the host until it reaches an infective threshold, at which point the infection is considered to  
303 be established (Schmid-Hempel 2011 pp. 225–6). In our assay, we considered that an  
304 infection was established when we could detect it; in other words, the infective threshold  
305 corresponded to the threshold for PCR detection (estimated at ~1 000 spores inside the host’s  
306 body, unpublished data). In these models, the probability per spore to start an infection,  $p$ , is  
307 equal to  $-\ln\left(\frac{\text{noninfected recipients}}{\text{total recipients}}\right)/D$  where  $D$  is the spore dose (Schmid-Hempel 2011 pp.  
308 225–6). In our transmission assay,  $D$  can be approximated by the number of spores in the  
309 fecal sample taken from the donor at the start of the assay (= spore count transformed to  
310 spores/mL, or \* 700), divided by  $5*8=40$  (fecal samples accumulated over a 5-day period but  
311 we only exposed recipients for one day; the inoculum was shared amongst 8 recipients). We  
312 calculated a value of  $p$  for every replicate in the transmission assay.

313 For each infection we used two measures of spore production as proxies for parasite fitness.  
314 First, we calculated a proxy for the ‘lifetime transmission success’: we summed the number  
315 of spores in the fecal samples taken on days 15, 30, 45 and 60 for each infection, then  
316 corrected this cumulative spore count by  $p$ , the average infectiousness of a single spore in a  
317 given host-parasite combination (as calculated above). Second, we calculated an asymptotic  
318 growth rate by computing the dominant eigenvalue of a standard Leslie matrix,

$$319 \quad \begin{bmatrix} 0 & n_{15} * p & n_{30} * p & n_{45} * p & n_{60} * p \\ s_{15} & 0 & 0 & 0 & 0 \\ 0 & s_{30} & 0 & 0 & 0 \\ 0 & 0 & s_{45} & 0 & 0 \\ 0 & 0 & 0 & s_{60} & 0 \end{bmatrix},$$

320 where  $n_i$  is the number of spores in the fecal sample on day  $i$ ,  $p$  is the average infectiousness  
321 of a single spore in that host-parasite combination (as calculated above), and  $s_i$  describes  
322 whether the host survived until day  $i$  (1) or not (0). While the lifetime transmission success is  
323 a measure of the basic reproduction number  $R_0$ , which describes parasite fitness under stable  
324 endemic conditions, the asymptotic growth rate is a measure of the net population growth  
325 rate, which describes fitness under epidemic conditions (Frank 1996, Hethcote 2000); we  
326 included both measures because either situation can occur in the field.

### 327 *Statistical analyses: infection vs. resistance*

328 In most of the experimental host-parasite combinations, a subset of exposed hosts did not  
329 become (detectably) infected. Hereafter, we refer to these individuals as resistant, because we  
330 found *a posteriori* differences in the proportion of such individuals across host-parasite  
331 combinations, and in their life history traits compared to infected individuals and controls. As  
332 above, the analyses of these two aspects excluded all individuals who died before infection  
333 status could be definitively determined, i.e. those that died before day 15 of the experiment.

334 We analyzed the distribution of resistance across host-parasite combinations. Within each  
335 host species, we used  $\chi^2$  tests to compare the numbers of resistant and infected hosts after  
336 exposure to *A. rigaudi* and *E. artemiae*. We also used  $\chi^2$  tests to test for an effect of sex on  
337 the probability of resistance to each parasite in *A. franciscana*, and for an effect of spore dose  
338 on the probability of resistance to *E. artemiae* in *A. parthenogenetica*.

339 There was substantial variation in infection outcome for the combinations *A. franciscana*-*A.*  
340 *rigaudi*, and *A. parthenogenetica*-*E. artemiae* (low dose) (see Results). Because costs of

341 resistance are a common aspect of host-parasite interactions (Schmid-Hempel 2003), we  
342 investigated whether resistance was related to host fitness in these combinations. To do this,  
343 we repeated the survival and reproduction analyses described above, with an added *Resistant-*  
344 *Infected-Control* factor. We added or excluded this factor and its interactions with the other  
345 fixed effects, then compared all models using the corrected AIC. In this way, we investigated  
346 whether the outcome of infection explained a significant part of the variation in host traits  
347 after the experimentally manipulated factors were taken into account. If the *Resistant-*  
348 *Infected-Control* factor was maintained in the best models, we used contrast manipulation  
349 and AICc-based model comparison to detect how the three host categories (*Resistant*,  
350 *Infected*, *Control*) differed.

## 351 RESULTS

### 352 Experiment 1: Infectivity

353 Both *A. parthenogenetica* and *A. franciscana* were more susceptible to infection with *A.*  
354 *rigaudi* than *E. artemiae* ( $\chi^2(3) \geq 20.9$ ,  $p < 0.001$  for both; Fig. 1). For *A. franciscana*, the  
355 slopes and inflection points of the two curves were not significantly different, but the upper  
356 limit was significantly higher for *A. rigaudi* than for *E. artemiae* ( $t=2.1$ ,  $p=0.03$ ). In *A.*  
357 *parthenogenetica*, the infectivity of the two parasites was markedly different: successful  
358 infections with *E. artemiae* required such a high spore dose that the inflection point and upper  
359 limit of its curve could not be computed; its slope was not significantly different to that of *A.*  
360 *rigaudi*. Mortality was not dose-dependent in any of the host-microsporidian combinations,  
361 so we can be confident that it did not skew results (Supp. Table 1).

### 362 Experiment 2: Virulence and transmission



363 Among host individuals that survived until we could be certain of their infection status (i.e.  
364 that survived until at least day 15), infection rates were high (Table 3). As expected, many  
365 fewer infections were detected among individuals that died before day 15. In general,  
366 infection rates in Experiment 2 were considerably higher than those in Experiment 1; this was  
367 most likely because the longer incubation time allowed slow-growing infections to become  
368 detectable.

### 369 *Virulence of infections*

370 We analyzed the species-level results of Experiment 2 in two parts. First, we analyzed the  
371 virulence of parasite infections, expressed as effects on host survival, growth, and  
372 reproduction. These results are summarized in Fig. 2 and the significance of tested effects is  
373 listed in Table 4; we discuss the effects of infection in more detail below. Here, we report  
374 only the analyses for infected vs. control individuals, which excluded all individuals that died  
375 before day 15. When we compared exposed vs. control individuals that died before the cut-  
376 off day the results were not qualitatively different.

377 In most host-parasite combinations, survival was reduced (Fig. 2, Table 4). For *A.*  
378 *franciscana*, a lognormal survival model best fit the data ( $\Delta\text{AICc} \geq 4.2$ ). Infection  
379 significantly reduced survival; post-hoc testing revealed that this effect was highly significant  
380 for *A. rigaudi* and marginally significant for *E. artemiae* ( $t = -6.7$  and  $-2.2$ ,  $p < 0.0001$  and  
381  $p = 0.05$ , respectively). For *A. parthenogenetica*, a log-logistic survival model best fit the data  
382 ( $\Delta\text{AICc} \geq 0.9$ ). Survival was affected by infection, size class, and their interaction, but this  
383 complicated interaction effect was due to the aberrant survival curves of one group of  
384 individuals (Batch  $34 \pm 2$  days old, Size class 7.5 mm), which had high death rates for  
385 controls and low death rates for infected hosts. When this group was removed, the interaction  
386 effect became non-significant. In general therefore, survival of *A. parthenogenetica* was

387 reduced by infection with a parasite; post-hoc testing revealed that individuals infected with  
388 *A. rigaudi* had significantly lower survival ( $t=-3.3$ ,  $p<0.01$ ), while individuals infected with  
389 *E. artemiae* did not ( $t=0.7$  and  $0.5$ ,  $p=0.86$  and  $0.94$  for low and high spore dose,  
390 respectively).

391 More than 90% of host growth occurred between days 1 and 30 (Supp. Table 2), so only this  
392 period was analyzed (Fig. 2, Table 4). For *A. franciscana*, infection significantly reduced  
393 growth; this effect was driven by *A. rigaudi* (post-hoc  $z=-3.1$ ,  $p<0.01$ ) and non-significant  
394 for *E. artemiae* (post-hoc  $z=-1.5$ ,  $p=0.23$ ). *A. parthenogenetica* growth was affected by  
395 infection interacting with size class, with the smallest size class growing slightly less when  
396 infected with a high dose of *E. artemiae*, and the middle size class growing slightly more  
397 when infected with either dose of *E. artemiae*.

398 Parasite infection affected the reproduction of *A. franciscana* females in various ways (Fig. 2,  
399 Table 4). The time until maturity, which was best described by a lognormal distribution  
400 ( $\Delta AICc \geq 4.7$ ), was significantly delayed by infection with either parasite species (post-hoc  
401 for *A. rigaudi*  $t=4.6$ ,  $p<0.0001$ ; post-hoc for *E. artemiae*  $t=2.5$ ,  $p=0.02$ ). The probability that  
402 *A. franciscana* females produced a clutch was also significantly lower when they were  
403 infected; this effect was driven by *A. rigaudi* (post-hoc  $z=-5.3$ ,  $p<0.0001$ ) and was  
404 marginally non-significant for *E. artemiae* (post-hoc  $z=-2.1$ ,  $p=0.06$ ). For *A. franciscana*  
405 females that did reproduce, infection with *A. rigaudi* increased the proportion of nauplii  
406 clutches (post-hoc for *A. rigaudi*  $z=3.9$ ,  $p<0.001$ ; post-hoc for *E. artemiae*  $z=0.8$ ,  $p=0.68$ ).  
407 The rate of offspring production was significantly reduced by infection with *E. artemiae* for  
408 all weights of nauplii vs. cysts (post-hoc for *E. artemiae*  $z \leq -2.8$ ,  $p \leq 0.01$ ), but was only  
409 significantly reduced by infection with *A. rigaudi* when cysts were weighted twice as much  
410 as nauplii ( $z=-2.3$ ,  $p=0.04$ ). Finally, the timing of offspring production was independent of  
411 infection status.

412 In contrast, parasite infection had little effect on the reproduction of *A. parthenogenetica*  
413 females (Fig. 2, Table 4). The effects of infection on the time until sexual maturity or the  
414 probability of producing a clutch could not be tested, because almost all *A. parthenogenetica*  
415 females started reproducing immediately. For reproducing females, neither the proportion of  
416 live clutches, nor the rate of offspring production were affected by infection with either  
417 parasite. However, infection with *A. rigaudi* did lead to a significant shift towards earlier  
418 reproduction (Fig. 3; significant effect of treatment when cysts were weighted equally or  
419 doubly compared to nauplii; post-hoc for *A. rigaudi*  $z \geq 2.6$ ,  $p \leq 0.03$  for all weights of nauplii  
420 vs. cysts; post-hoc for *E. artemiae*  $z \leq 1.1$ ,  $p \geq 0.58$  for all weights of nauplii vs. cysts).

421 The fitness of female hosts – estimated by the lifetime reproductive success (LRS), i.e. the  
422 total number of offspring produced – was significantly reduced by infection with either  
423 parasite for *A. franciscana* (post-hoc for *A. rigaudi*  $t \leq -7.3$ ,  $p \leq 0.0001$  for all weights of  
424 nauplii vs. cysts; post-hoc for *E. artemiae*  $t \leq -3.9$ ,  $p \leq 0.001$  for all weights of nauplii vs.  
425 cysts), but not for *A. parthenogenetica* (Fig. 2, Table 4).

#### 426 *Transmission and fitness of infections*

427 Second, we studied the effects of the host species on the parasite's transmission and fitness  
428 (summarized in Fig. 4). These analyses were combined for all host-parasite combinations, but  
429 *A. parthenogenetica* that were exposed to 10000 *E. artemiae* spores were analyzed separately  
430 unless otherwise specified.

431 The infectiousness of a single spore (the probability that it started a detectable infection, as  
432 calculated using the transmission data) corresponded with our expectations based on  
433 Experiment 1 (Fig. 4). Host-parasite combination had a significant effect on infectiousness  
434 ( $\chi^2(1) = 16.7$ ,  $p < 0.0001$ ). *A. rigaudi* tended to be more infectious to *A. parthenogenetica* than

435 to *A. franciscana* (post-hoc  $z=2.3$ ,  $p=0.10$ ); *E. artemiae* was significantly more infectious to  
436 *A. franciscana* than to *A. parthenogenetica* (post-hoc  $z=3.6$ ,  $p<0.01$ ).

437 The rates of spore production were significantly different in all host-parasite combinations  
438 (overall  $\chi^2(1)=205.9$ ,  $p<0.0001$ ; all post-hoc pairwise comparisons  $z\geq 3.2$ ,  $p<0.01$ ; Fig. 4);  
439 they were highest in the combinations *A. parthenogenetica*-*A. rigaudi* and *A. franciscana*-*E.*  
440 *artemiae*. For *A. parthenogenetica* infected with *E. artemiae*, the rate of spore production was  
441 notably higher when the initial inoculum was larger ( $\chi^2(1)=10.6$ ,  $p=0.001$ ).

442 As expected, host-to-host transmission success increased with the rate of spore production in  
443 all host-parasite combinations (Spearman's  $\rho$  between 0.57 and 0.69,  $p<0.0001$ ; Supp. Fig.  
444 1). Therefore, we were able to use the lifetime transmission success and asymptotic growth  
445 rate as indicators of parasite fitness. The two measures were tightly correlated (Supp. Fig. 2)  
446 and both differed across host-parasite combinations ( $\chi^2(4)=189.9$  and 245.0, respectively,  
447  $p<0.0001$ ; Fig. 4). The fitness of *A. rigaudi* infections was highest in *A. parthenogenetica*;  
448 that of *E. artemiae* infections was highest in *A. franciscana*. All pairs of host-parasite  
449 combinations were significantly different, except the low-performers *A. parthenogenetica*-*E.*  
450 *artemiae* and *A. franciscana*-*A. rigaudi* (post-hoc  $p<0.001$  vs.  $p=0.46$  and  $p\leq 0.04$  vs.  
451  $p=0.69$ , respectively). This was true for both spore doses of *A. parthenogenetica*-*E. artemiae*  
452 regarding the lifetime transmission success, but only for the low spore dose for the  
453 asymptotic growth rate.

#### 454 *Infection vs. resistance*

455 Among the individuals that survived until we could be certain of their infection status, the  
456 rate of resistance varied between 0 and 36% in the different host-parasite combinations  
457 (Table 5). For *A. franciscana*, significantly more individuals resisted infection with *A. rigaudi*  
458 than with *E. artemiae* ( $\chi^2(1)=10.4$ ,  $p<0.01$ ), and this effect was independent of sex

459 ( $\chi^2(1)=0.3, p=0.58$ ). Similarly, significantly more *A. parthenogenetica* resisted infection with  
460 *E. artemiae* ( $\chi^2(1)=20.6, p<0.0001$ ), with a marginally non-significant difference between  
461 the two spore doses ( $\chi^2(1)=3.8, p=0.052$ ). There was substantial variation in infection  
462 outcome for the combinations *A. franciscana*-*A. rigaudi*, and *A. parthenogenetica*-*E.*  
463 *artemiae* (low dose), so we continued our analyses with these combinations.

464 For both *A. franciscana* exposed to *A. rigaudi* and *A. parthenogenetica* exposed to a low  
465 spore dose of *E. artemiae*, resistant individuals died more quickly than infected individuals  
466 (Fig. 5;  $\Delta AICc$  respectively  $>4.4$  and  $=1.6$ , Supp. Table 3). For *A. franciscana*, resistant males  
467 had a higher mortality than resistant females (Fig. 5;  $\Delta AICc >1.7$ , Supp. Table 3).

468 Finally, there was little support for an effect of resistance on reproduction in females of either  
469 host species (Supp. Table 4). *A. franciscana* females that resisted infection with *A. rigaudi*  
470 behaved similarly to females that became infected (strong effects of *Resistant-Infected-*  
471 *Control*, but no or weak support for a difference between resistant and infected females). The  
472 reproductive behavior of *A. parthenogenetica* females that resisted infection with a low dose  
473 of *E. artemiae* was similar to that of infected and control females.

## 474 **DISCUSSION**

475 The degree of host specialization is a key property of any multi-host parasite. Host  
476 specialization, when considered as a difference in fitness, arises from a series of life history  
477 traits including the ability to infect, the rate of transmission, and the virulence. We quantified  
478 these traits for two microsporidian gut parasites (*A. rigaudi* and *E. artemiae*) infecting two  
479 brine shrimp hosts (*A. franciscana* and *A. parthenogenetica*), by tracking the life history of  
480 both hosts and parasites after experimental infection. A brief synopsis of the results is shown  
481 in Table 6.

482 Overall, each of the parasites was partially specialized: *A. rigaudi* was very successful in *A.*  
483 *parthenogenetica*, while *E. artemiae* performed best in *A. franciscana*. Below, we discuss  
484 how the individual life-history traits combine to shape the degree of specialization, and the  
485 ensuing effects of specialization on the hosts. We refer to the host-parasite combinations  
486 where parasites reached high fitness as the ‘matched’ combinations (Table 6). The reversed  
487 combinations also produced viable transmission stages, but at much lower rates; we will call  
488 these the ‘mismatched’ combinations.

#### 489 *Partial specialization via a mix of specialist and generalist traits*

490 Specialization is often presented as a dichotomy: specialists, whose fitness is high or null for  
491 different hosts, versus generalists, who generally have intermediate fitness on several hosts  
492 (Poulin 2007 chap. 3, Schmid-Hempel 2011 chap. 7, Leggett et al. 2013). *A. rigaudi* and *E.*  
493 *artemiae* fall into a gray zone between these categories, being neither absolute specialists –  
494 they can exploit both hosts –, nor absolute generalists – their fitness is much higher in the  
495 matched hosts.

496 When broken down into its component traits, the origin of this partial specialization becomes  
497 clear. Parasites should be as infective as possible to hosts to which they are adapted, and  
498 indeed both *A. rigaudi* and *E. artemiae* are highly infectious to their matched hosts. Similarly,  
499 we expect strong transmission to be advantageous, and accordingly we find that both  
500 parasites have high rates of spore production in their matched hosts. The expectations for  
501 virulence are not as clear-cut. A ‘Darwinian devil’ parasite would be avirulent while  
502 maintaining high transmission rates, but it is generally considered that these two factors are  
503 correlated (Alizon et al. 2009). Virulence must therefore be judged in relation to  
504 transmission; for example, high virulence can be adaptive if coupled with high rates of  
505 transmission, or maladaptive if not. When considered in this way, *A. rigaudi* and *E.*

506 *artemiae*'s virulence are also coherent with their overall specialization. *A. rigaudi* causes high  
507 survival virulence – and thus short infection durations – in both hosts, but this is  
508 advantageously coupled with high rates of spore production in its matched host *A.*  
509 *parthenogenetica*, and disadvantageously coupled with low rates of spore production in its  
510 mismatched host. *E. artemiae* is avirulent in its mismatched host, which at first glance  
511 appears ideal. However, when spore production is taken into account, it becomes clear that  
512 this avirulence in *A. parthenogenetica* is coupled with very low rates of transmission,  
513 whereas the rate of spore production is high in *A. franciscana*.

514 Despite this, were we to consider the component traits individually, they would not all lead us  
515 to conclude that the two parasites are partially specialized. The pattern of spore production in  
516 the matched vs. mismatched combinations best reflects the overall degree of specialization.  
517 Infectivity, on its own, might lead us to conclude that *E. artemiae* is a specialist while *A.*  
518 *rigaudi* is more generalist (also discussed in Lievens et al. subm.). Virulence is difficult to  
519 interpret outside the context of spore production, as discussed above, making it a particularly  
520 poor proxy for overall specialization. Integrating across all of these life history traits is  
521 therefore necessary to properly understand the nature of this host-parasite system, and will  
522 probably have important implications for the evolution of virulence (Alizon and Michalakis  
523 2015) and infection success (Hall et al. 2017).

#### 524 *Mismatched parasites have different kinds of suboptimal virulence*

525 Several theoretical predictions have been made for the evolution of virulence in multi-host  
526 parasites that are specialized on one host and spill over into another (source-sink dynamics),  
527 all of which agree that virulence should depend exclusively on the optimum in the specialized  
528 host (Regoes et al. 2000, Woolhouse et al. 2001, Dobson 2004, Gandon 2004). Predictions of  
529 virulence in the non-specialized host, however, vary. Regoes et al. considered virulence to be



530 coupled to exploitation, which trades off between hosts; their prediction is that the parasite  
531 will be avirulent in the spillover host. Gandon also considered virulence to be coupled to  
532 exploitation, but in his model the level of exploitation is correlated between hosts. In this  
533 case, the parasite can be maladaptively avirulent or hypervirulent in the spillover host,  
534 depending on the relative resistances of the hosts. Finally, Woolhouse et al. pointed out that  
535 virulence can become decoupled from parasite exploitation in spillover hosts, for example  
536 through harmful immune responses (Graham et al. 2005), leading to maladaptively high  
537 virulence (see also Leggett et al. 2013). Empirically, virulence patterns across multiple hosts  
538 have only rarely been studied in natural systems (Rigaud et al. 2010), so it is difficult to  
539 determine which of these possibilities may be more common.

540 In the mismatched hosts of our *Artemia*-microsporidian system, two different virulence  
541 patterns are apparent. First, in the combination *A. franciscana*-*A. rigaudi*, the parasite is very  
542 virulent on a host in which it can barely reproduce. Its virulence in the non-specialized host is  
543 thus decoupled from exploitation and maladaptive, matching Woolhouse et al. (2001)'s  
544 prediction for unconstrainedly high virulence. The situation of *A. rigaudi* strongly resembles  
545 that of the generalist microsporidian parasite *Nosema bombi*, which infects bumble bees. Two  
546 of *N. bombi*'s most important hosts are *Bombus terrestris*, in whom it is so virulent that it  
547 cripples its own year-to-year transmission, and *Bombus lucorum*, in whom its virulence is  
548 moderate enough to allow transmission (Rutrecht and Brown 2009). A number of zoonotic  
549 human diseases also fit this pattern (Woolhouse et al. 2001, cf. Auld et al. 2017). In contrast,  
550 in the mismatched combination *A. parthenogenetica*-*E. artemiae*, the parasite is avirulent. *E.*  
551 *artemiae* could therefore correspond to the situations described by Regoes et al. (2000) and  
552 Gandon (2004), in which a non-specialized host is under-exploited and suffers no virulence.  
553 Indeed, *A. parthenogenetica* is also less susceptible to *E. artemiae*, giving some support to  
554 Gandon's scenario of differently resistant hosts. A similar case could be made for the



555 nematode *Howardula aoronymphium* (Jaenike 1996, Jaenike and Dombeck 1998, Perlman  
556 and Jaenike 2003) and for the *Drosophila C* virus (Longdon et al. 2015), which exhibit a  
557 range of exploitation and correlated virulence across host species.

558 Overall, our results provide support for the varied possible theoretical predictions of  
559 virulence evolution in multi-host parasites: in one case, we appear to be dealing with  
560 decoupled, ‘runaway’ virulence, while in the second the differences in virulence may be  
561 driven by levels of host resistance. These contrasting findings show that the different  
562 theoretical outcomes can even be found among host-parasite pairs that are ecologically  
563 extremely similar and phylogenetically close.

#### 564 *Mismatched hosts incur high costs of resistance*

565 In the matched host-parasite combinations, uninfected individuals were rare or nonexistent  
566 (Table 5), and suffered no detectable survival cost (data not shown). It is possible that an  
567 extremely high mortality rate of resistant individuals caused them to die before we could  
568 reliably detect infection, leading us to underestimate both the frequency and the cost of  
569 resistance. However, survival rates for the matched combinations were universally high in the  
570 infectivity experiment, which lasted one week. Any mortality conferred by resistance would  
571 therefore have to be incurred precisely in the second week of infection, which is unlikely. It is  
572 more probable that the high rates of infection reflect selection on the parasite to evade or  
573 overcome resistance in its matched host (Hasu et al. 2009).

574 In the mismatched host-parasite combinations, however, up to one third of the exposed hosts  
575 were uninfected, and the life histories of these individuals differed clearly from those of  
576 control or infected hosts (Table 5, Fig. 5). This suggests that their lack of infection was the  
577 result of an active resistance mechanism. Because the parasite was absent, the effects of  
578 deploying resistance must have been induced by the host itself, as a consequence of its

579 immune reaction upon exposure (immunopathology, Schmid-Hempel 2003, Graham et al.  
580 2005).

581 This resistance was extremely costly: resistant individuals died much more rapidly than  
582 control and infected hosts (Fig. 5). Since there was no detectable compensation through  
583 increased fecundity, we must conclude that resistance in these cases is maladaptive. This is  
584 intriguing, because *A. franciscana* and *A. parthenogenetica* are regularly exposed to their  
585 mismatched parasites in the field (Lievens et al. subm.). Host resistance has been shown to  
586 evolve quickly in a similar host-parasite system (*Daphnia magna*-*Octosporea bayeri*,  
587 Zbinden et al. 2008), so we would not expect maladaptive resistance responses to persist in  
588 the host populations. An explanation may be that source-sink dynamics acting in the parasite  
589 populations prevent them from evolving to reduce their impact on the mismatched hosts. In  
590 turn, selection on the host to reduce its response to the mismatched parasite could perhaps be  
591 countered by other factors, such as the need to maintain its overall immune capacity (Graham  
592 et al. 2005). Similarly disproportionate costs of resistance, with uninfected hosts dying more  
593 rapidly than even infected hosts, have been found in e.g. *Daphnia* resisting the bacterium  
594 *Pasteuria* (Little and Killick 2007, though see Labbé et al. 2010), and naïve isopods resisting  
595 infection with a helminth (Hasu et al. 2009).

#### 596 *Infection with A. rigaudi causes shifts in reproductive strategy*

597 *A. parthenogenetica* females infected with their matched parasite *A. rigaudi* died more  
598 quickly than controls and did not produce offspring at a higher overall rate, yet did not suffer  
599 from reduced lifetime reproductive success. They managed this by shifting towards earlier  
600 reproduction to alleviate the survival virulence, a plastic behavior known as fecundity  
601 compensation (cf. Minchella and Loverde 1981, Agnew et al. 2000, Chadwick and Little  
602 2005) (Fig. 3). Females accomplished this shift in reproductive effort by increasing the size,

603 rather than the frequency, of early clutches (frequency data not shown). This is a new finding  
604 for *Artemia*, which opens a number of interesting new avenues of research. For example,  
605 Mediterranean *A. parthenogenetica* are also heavily infected with the castrating cestode  
606 *Flamingolepis liguloides* (Amat et al. 1991). If fecundity compensation is also possible in the  
607 face of *F. liguloides* infections, this would drastically change our understanding of the overall  
608 impact of this parasite. Alternatively, a recent study has shown that the fecundity  
609 compensation response of snails can be suppressed when they undergo additional stress  
610 (Gleichsner et al. 2016). Studying the relationship between common environmental stressors  
611 of *A. parthenogenetica*, such as salinity, and their ability to shift their reproductive effort may  
612 help us understand the evolutionary relevance of such mechanisms.

613 *A. franciscana* females did not have a similar fecundity compensation response when infected  
614 with either parasite. However, infections of *A. franciscana* with *A. rigaudi* were associated  
615 with an interesting change in reproductive strategy. Infected females were less likely to  
616 produce a clutch, but those that did reproduce were more likely to produce clutches of live  
617 young. Considering that *Artemia* generally produce cysts when stressed (Clegg and Trotman  
618 2002), this result seems counterintuitive. Perhaps *A. rigaudi* interferes with the cyst  
619 production mechanism, either collaterally or as a manipulation to increase the availability of  
620 susceptible hosts. Another possibility is that a shift towards live born offspring is  
621 advantageous for the host. If infected mothers can produce offspring that are protected  
622 against the parasite, for example via transgenerational immune priming (which *Artemia* can  
623 do, Norouzitallab et al. 2015), those offspring should have a competitive advantage when  
624 encountering the parasite. If this protection is costly, it may be more worthwhile to produce  
625 protected nauplii than protected cysts: protected nauplii will certainly be born into a parasite-  
626 infested environment, while the hatching environment of protected cysts is unknown.

627 *Comparison with the field: previous & future results*

628 Quite remarkably, the results of this study are consistent with all the field observations and  
629 previous laboratory results of the *Artemia*-microsporidian system. Our identification of the  
630 matched and mismatched host-parasite combinations is consistent with the field data, which  
631 shows that *A. rigaudi* is dependent on its matched host to persist in the natural host  
632 community, and suggests that the same may be true for *E. artemiae* (Lievens et al. subm.). As  
633 *E. artemiae* and *A. rigaudi* performed equally poorly in their mismatched hosts, this  
634 experiment supports that suggestion. Our results for infectivity also reflect the consistently  
635 higher prevalence of *A. rigaudi* and *E. artemiae* in respectively *A. parthenogenetica* and *A.*  
636 *franciscana* (Lievens et al. subm., Rode et al. 2013c). In addition, we find that *A. rigaudi* is  
637 considerably more virulent than *E. artemiae* in both host species. Rode et al. (2013c) reached  
638 a similar conclusion based on the reproductive state of females collected from the field.  
639 Interestingly, the effect found by Rode et al. was that sexually mature females of both species  
640 were less likely to be brooding a clutch when they were infected with *A. rigaudi*, while in our  
641 study *A. rigaudi* did not affect the frequency of clutching once sexual maturity had been  
642 reached (data not shown). The different conditions in the field may be responsible for this  
643 seemingly additional virulence (e.g. food limitation, Brown et al. 2000, Bedhomme et al.  
644 2004, Vale et al. 2011; temperature, Mitchell et al. 2005, Vale et al. 2008).

645 Further insights into the relationship between the microsporidians and their *Artemia* hosts  
646 could come from experimental coinfections. So far, we have examined the effects of *A.*  
647 *rigaudi* and *E. artemiae* in isolation, but coinfections are very common in the field (Lievens  
648 et al. subm.). Coinfection often has profound effects on the expression of parasite virulence  
649 and the success of their transmission, and can thus be expected to affect the evolution of  
650 microsporidian life history and host responses (Rigaud et al. 2010, Alizon et al. 2013).  
651 Studying the effects of single vs. mixed infections could therefore provide new perspectives  
652 into selection on ecological specialization in the field.

## 653 **CONCLUSION**

654 In nature, multi-host parasites and multi-parasite hosts are likely to be the rule, rather than the  
655 exception (Cleaveland et al. 2001, Taylor et al. 2001, Streicker et al. 2013). Despite important  
656 research efforts in these complex systems, we still know little about the interplay between  
657 parasite specialization and its component traits (Rutrecht and Brown 2009, Rigaud et al.  
658 2010, Hall et al. 2017). In this study, we dissected the fitness traits involved in parasite  
659 adaptation in all combinations of a naturally occurring two-host, two-parasite system. We  
660 showed that both parasites are partially specialized, with each performing better on one of the  
661 two host species. Furthermore, studying the underlying life-history traits revealed that the  
662 heart of this specialization is the delicate balance between over- and under-exploitation of the  
663 host: the drivers of infection success were spore production and the ‘tuning’ of parasite  
664 virulence to match it. This occurred despite the ecological and phylogenetic similarity of the  
665 hosts and parasites, highlighting the difficulty of adapting (or not) to multiple host species.

## 666 **ACKNOWLEDGEMENTS**

667 We warmly thank C. Gilliot and R. Zahab for their help running the experiment and with  
668 PCR testing, T. Aubier for his assistance with the transmission assay, R. Blatrix and J.-P.  
669 Brizard for their help with the spore counting protocol, D. Degueudre for help preparing the  
670 experimental material, and the CNRS security team for regulating the light cycle on  
671 weekends. We are also grateful to A. B. Duncan, M. A. Duffy, and E. Decaestecker for  
672 constructive comments on the manuscript. YM and TL acknowledge support from CNRS and  
673 IRD.

## 674 **AUTHOR CONTRIBUTIONS**

675    Conceptualization, E.J.P.L., Y.M. and T.L.; Methodology, P.A., J.P. and E.J.P.L.;

676    Investigation, J.P. and E.J.P.L.; Formal Analysis, E.J.P.L. and J.P.; Writing – Original Draft,

677    E.J.P.L.; Writing – Review and Editing, E.J.P.L., Y.M. and T.L.; Supervision, Y.M. and T.L.

678 **REFERENCES**

- 679 Agnew, P., J. C. Koella, and Y. Michalakis. 2000. Host life history responses to parasitism.  
680 *Microbes and Infection* 2:891–896.
- 681 Agosta, S. J., N. Janz, and D. R. Brooks. 2010. How specialists can be generalists: resolving  
682 the “parasite paradox” and implications for emerging infectious disease. *Zoologia*  
683 27:151–162.
- 684 Agudelo-Romero, P., F. de la Iglesia, and S. F. Elena. 2008. The pleiotropic cost of host-  
685 specialization in Tobacco etch polyvirus. *Infection, Genetics and Evolution* 8:806–814.
- 686 Ahonen, R., S. Puustinen, and P. Mutikainen. 2006. Host use of a hemiparasitic plant: No  
687 trade-offs in performance on different hosts. *Journal of Evolutionary Biology* 19:513–  
688 521.
- 689 Alizon, S., A. Hurford, N. Mideo, and M. Van Baalen. 2009. Virulence evolution and the  
690 trade-off hypothesis: history, current state of affairs and the future. *Journal of*  
691 *Evolutionary Biology* 22:245–59.
- 692 Alizon, S., and Y. Michalakis. 2015. Adaptive virulence evolution: the good old fitness-based  
693 approach. *Trends in Ecology and Evolution* 30:248–254.
- 694 Alizon, S., J. C. de Roode, and Y. Michalakis. 2013. Multiple infections and the evolution of  
695 virulence. *Ecology Letters* 16:556–567.
- 696 Amat, F., A. Gozalbo, J. C. Navarro, F. Hontoria, and I. Varó. 1991. Some aspects of *Artemia*  
697 biology affected by cestode parasitism. *Hydrobiologia* 212:39–44.
- 698 Amat, F., F. Hontoria, O. Ruiz, A. J. Green, M. I. Sánchez, J. Figuerola, and F. Hortas. 2005.  
699 The American brine shrimp as an exotic invasive species in the western Mediterranean.  
700 *Biological Invasions* 7:37–47.
- 701 Auld, S. K. J. R., C. L. Searle, and M. A. Duffy. 2017. Parasite transmission in a natural  
702 multihost – multiparasite community. *Philosophical Transactions of the Royal Society B*  
703 372:20160097.
- 704 Bates, D., M. Maechler, B. Bolker, and S. Walker. 2015. Fitting Linear Mixed-Effects  
705 Models Using lme4. *Journal of Statistical Software* 67:1–48.
- 706 Bedhomme, S., P. Agnew, C. Sidobre, and Y. Michalakis. 2004. Virulence reaction norms  
707 across a food gradient. *Proceedings of the Royal Society of London, Series B* 271:739–  
708 744.
- 709 Bowen, S. T. 1962. The genetics of *Artemia salina*. I. The reproductive cycle. *The Biological*  
710 *Bulletin* 122:25–32.

- 711 Brown, M. J. F., R. Loosli, and P. Schmid-Hempel. 2000. Condition-dependent expression of  
712 virulence in a trypanosome infecting bumblebees. *Oikos* 91:421–427.
- 713 Cezer, M. L. 2016. Adaptation to an invasive host is driving the loss of a native ecotype.  
714 *Evolution* 70:2296–2307.
- 715 Chadwick, W., and T. J. Little. 2005. A parasite-mediated life-history shift in *Daphnia*  
716 *magna*. *Proceedings of the Royal Society of London, Series B* 272:505–509.
- 717 Cleaveland, S., M. K. Laurenson, and L. H. Taylor. 2001. Diseases of humans and their  
718 domestic mammals: pathogen characteristics, host range and the risk of emergence.  
719 *Philosophical Transactions of the Royal Society B: Biological Sciences* 356:991–9.
- 720 Clegg, J. S., and C. N. A. Trotman. 2002. Physiological and biochemical aspects of *Artemia*  
721 ecology. Pages 129–170 in T. J. Abatzopoulos, J. A. Beardmore, J. S. Clegg, and P.  
722 Sorgeloos, editors. *Artemia: Basic and Applied Biology*. Kluwer Academic Publishers.
- 723 Desdevises, Y., S. Morand, and P. Legendre. 2002. Evolution and determinants of host  
724 specificity in the genus *Lamellodiscus* (Monogenea). *Biological Journal of the Linnean*  
725 *Society* 77:431–443.
- 726 Dobson, A. 2004. Population dynamics of pathogens with multiple host species. *The*  
727 *American Naturalist* 164 Suppl:S64–S78.
- 728 Doumayrou, J., A. Avellan, R. Froissart, and Y. Michalakis. 2012. An experimental test of  
729 the transmission-virulence trade-off hypothesis in a plant virus. *Evolution* 67:477–486.
- 730 Dwyer, G., S. A. Levin, and L. Buttel. 1990. A simulation model of the population dynamics  
731 and evolution of myxomatosis. *Ecological Monographs* 60:423–447.
- 732 Fels, D. 2006. Transmission of the microsporidian *Glugoides intestinalis* in relation to spatial  
733 structure of the host *Daphnia magna*. *Archiv für Hydrobiologie* 165:455–467.
- 734 Fenton, A., D. G. Streicker, O. L. Petchey, and A. B. Pedersen. 2015. Are All Hosts Created  
735 Equal? Partitioning Host Species Contributions to Parasite Persistence in Multihost  
736 Communities. *The American Naturalist* 186:610–622.
- 737 Frank, S. A. 1996. Models of parasite virulence. *Quarterly Review of Biology* 71:37–78.
- 738 Fraser, C., T. D. Hollingsworth, R. Chapman, F. de Wolf, and W. P. Hanage. 2007. Variation  
739 in HIV-1 set-point viral load: Epidemiological analysis and an evolutionary hypothesis.  
740 *Proceedings of the National Academy of Sciences of the United States of America*  
741 104:17441–6.
- 742 Futuyma, D. J., and G. Moreno. 1988. The Evolution of Ecological Specialization. *Annual*  
743 *Review of Ecology and Systematics* 19:207–233.
- 744 Gandon, S. 2004. Evolution of multihost parasites. *Evolution* 58:455–469.



- 745 Gleichsner, A. M., J. A. Cleveland, and D. J. Minchella. 2016. One stimulus - Two responses:  
746 Host and parasite life history variation in response to environmental stress. *Evolution*.
- 747 Graham, A. L., J. E. Allen, and A. F. Read. 2005. Evolutionary causes and consequences of  
748 immunopathology. *Annual Review of Ecology, Evolution, and Systematics* 36:373–397.
- 749 Hall, M. D., G. Bento, and D. Ebert. 2017. The evolutionary consequences of stepwise  
750 infection processes. *Trends in Ecology & Evolution* 32:612–623.
- 751 Hasu, T., D. P. Benesh, and E. T. Valtonen. 2009. Differences in parasite susceptibility and  
752 costs of resistance between naturally exposed and unexposed host populations. *Journal*  
753 *of Evolutionary Biology* 22:699–707.
- 754 Hethcote, H. W. 2000. The Mathematics of Infectious Diseases. *Society for Industrial and*  
755 *Applied Mathematics Review* 42:599–653.
- 756 Hothorn, T., F. Bretz, and P. Westfall. 2008. Simultaneous Inference in General Parametric  
757 Models. *Biometrical Journal* 50:346–363.
- 758 Hurvich, C. M., and C. L. Tsai. 1989. Regression and Time-Series Model Selection in Small  
759 Samples. *Biometrika* 76:297–307.
- 760 Jaenike, J. 1996. Suboptimal virulence of an insect-parasitic nematode. *Evolution* 50:2241–  
761 2247.
- 762 Jaenike, J., and I. Dombeck. 1998. General-purpose genotypes for host species utilization in a  
763 nematode parasite of *Drosophila*. *Evolution* 52:832–840.
- 764 Johnson, K. P., J. R. Malenke, and D. H. Clayton. 2009. Competition promotes the evolution  
765 of host generalists in obligate parasites. *Proceedings of the Royal Society of London,*  
766 *Series B* 276:3921–3926.
- 767 Kassen, R. 2002. The experimental evolution of specialists, generalists, and the maintenance  
768 of diversity. *Journal of Evolutionary Biology* 15:173–190.
- 769 Kawecki, T. J. 1994. Accumulation of deleterious mutations and the evolutionary cost of  
770 being a generalist. *The American Naturalist* 144:833–838.
- 771 Kawecki, T. J. 1998. Red Queen Meets Santa Rosalia: Arms Races and the Evolution of Host  
772 Specialization. *The American Naturalist* 152:635–651.
- 773 Labbé, P., P. F. Vale, and T. J. Little. 2010. Successfully resisting a pathogen is rarely costly  
774 in *Daphnia magna*. *BMC Evolutionary Biology* 10:355.
- 775 Leggett, H. C., A. Buckling, G. H. Long, and M. Boots. 2013. Generalism and the evolution  
776 of parasite virulence. *Trends in Ecology & Evolution* 28:592–6.
- 777 Levins, R. 1968. *Evolution in changing environments*. Princeton University Press, Princeton,  
778 NJ.

- 779 Lievens, E. J. P., G. J. B. Henriques, Y. Michalakis, and T. Lenormand. 2016. Maladaptive  
780 sex ratio adjustment in the invasive brine shrimp *Artemia franciscana*. *Current Biology*  
781 26:1463–1467.
- 782 Lievens, E. J. P., N. O. Rode, J. Landes, A. Segard, R. Jabbour-Zahab, Y. Michalakis, and T.  
783 Lenormand. (submitted). Long-term prevalence data reveals spillover dynamics in a  
784 multi-host (*Artemia*), multi-parasite (Microsporidia) community. doi: 10.1101/248542
- 785 Little, T. J., and S. C. Killick. 2007. Evidence for a cost of immunity when the crustacean  
786 *Daphnia magna* is exposed to the bacterial pathogen *Pasteuria ramosa*. *Journal of*  
787 *Animal Ecology* 76:1202–1207.
- 788 Longdon, B., J. D. Hadfield, J. P. Day, S. C. L. Smith, J. E. McGonigle, R. Cogni, C. Cao,  
789 and F. M. Jiggins. 2015. The Causes and Consequences of Changes in Virulence  
790 following Pathogen Host Shifts. *PLoS Pathogens* 11:1–18.
- 791 Lymbery, A. J. 1989. Host Specificity, Host Range and Host Preference. *Parasitology Today*  
792 5:1989.
- 793 Metalli, P., and E. Ballardin. 1970. Radiobiology of *Artemia*: radiation effects and ploidy.  
794 *Current Topics in Radiation Research Quarterly* 7:181–240.
- 795 Minchella, D. J., and P. T. Loverde. 1981. A cost of increased early reproductive effort in the  
796 snail *Biomphalaria glabrata*. *The American Naturalist* 118:876–881.
- 797 Mitchell, S. E., E. S. Rogers, T. J. Little, and A. F. Read. 2005. Host-parasite and genotype-  
798 by-environment interactions: Temperature modifies potential for selection by a  
799 sterilizing pathogen. *Evolution* 59:70–80.
- 800 Norouzitallab, P., P. Biswas, K. Baruah, and P. Bossier. 2015. Multigenerational immune  
801 priming in an invertebrate parthenogenetic *Artemia* to a pathogenic *Vibrio campbellii*.  
802 *Fish and Shellfish Immunology* 42:426–429.
- 803 Noug e, O., N. O. Rode, R. Jabbour-zahab, A. S gard, L.-M. Chevin, C. R. Haag, and T.  
804 Lenormand. 2015. Automixis in *Artemia*: solving a century-old controversy. *Journal of*  
805 *Evolutionary Biology* 28:2337–2348.
- 806 Perlman, S. J., and J. Jaenike. 2003. Infection Success in Novel Hosts: an Experimental and  
807 Phylogenetic Study of *Drosophila* -Parasitic Nematodes. *Evolution* 57:544–557.
- 808 Pohlert, T. 2014. The Pairwise Multiple Comparison of Mean Ranks Package (PMCMR).
- 809 Poulin, R. 2007. Evolutionary ecology of parasites.
- 810 Poulin, R., and D. B. Keeney. 2008. Host specificity under molecular and experimental  
811 scrutiny. *Trends in Parasitology* 24:24–28.
- 812 Pulliam, H. R. 1988. Sources, sinks and population regulation. *The American Naturalist*  
813 132:652–661.

- 814 R Core Team. 2014. R: A language and environment for statistical computing. R Foundation  
815 for Statistical Computing, Vienna, Austria.
- 816 Reeve, M. R. 1963. The filter-feeding of *Artemia* I. In pure cultures of plant cells. The  
817 Journal of Experimental Biology 40:195–205.
- 818 Regoes, R. R., M. A. Nowak, and S. Bonhoeffer. 2000. Evolution of virulence in a  
819 heterogeneous host population. Evolution 54:64–71.
- 820 Rhodes, C. J., R. P. Atkinson, R. M. Anderson, and D. W. Macdonald. 1998. Rabies in  
821 Zimbabwe: reservoir dogs and the implications for disease control. Philosophical  
822 Transactions of the Royal Society B: Biological Sciences 353:999–1010.
- 823 Rigaud, T., M.-J. Perrot-Minnot, and M. J. F. Brown. 2010. Parasite and host assemblages:  
824 embracing the reality will improve our knowledge of parasite transmission and  
825 virulence. Proceedings of the Royal Society of London, Series B:3693–3702.
- 826 Ritz, C., and J. C. Streibig. 2005. Bioassay Analysis using R. Journal of Statistical Software  
827 12.
- 828 Rode, N. O., A. Charmantier, and T. Lenormand. 2011. Male-female coevolution in the wild:  
829 evidence from a time series in *Artemia franciscana*. Evolution 65:2881–2892.
- 830 Rode, N. O., J. Landes, E. J. P. Lievens, E. Flaven, A. Segard, R. Jabbour-Zahab, Y.  
831 Michalakis, P. Agnew, C. P. Vivarès, and T. Lenormand. 2013a. Cytological, molecular  
832 and life cycle characterization of *Anostracospira rigaudi* n. g., n. sp. and  
833 *Enterocytophora artemiae* n. g., n. sp., two new microsporidian parasites infecting gut  
834 tissues of the brine shrimp *Artemia*. Parasitology 140:1168–85.
- 835 Rode, N. O., E. J. P. Lievens, E. Flaven, A. Segard, R. Jabbour-Zahab, M. I. Sanchez, and T.  
836 Lenormand. 2013b. Why join groups? Lessons from parasite-manipulated *Artemia*.  
837 Ecology letters 16:493–501.
- 838 Rode, N. O., E. J. P. Lievens, A. Segard, E. Flaven, R. Jabbour-Zahab, and T. Lenormand.  
839 2013c. Cryptic microsporidian parasites differentially affect invasive and native *Artemia*  
840 spp. International Journal for Parasitology 43:795–803.
- 841 De Roode, J. C., A. J. Yates, and S. Altizer. 2008. Virulence-transmission trade-offs and  
842 population divergence in virulence in a naturally occurring butterfly parasite.  
843 Proceedings of the National Academy of Sciences of the United States of America  
844 105:7489–7494.
- 845 Rutrecht, S. T., and M. J. F. Brown. 2009. Differential virulence in a multiple-host parasite of  
846 bumble bees: Resolving the paradox of parasite survival? Oikos 118:941–949.
- 847 Schmid-Hempel, P. 2003. Variation in immune defence as a question of evolutionary  
848 ecology. Proceedings of the Royal Society of London, Series B 270:357–366.
- 849 Schmid-Hempel, P. 2011. Evolutionary parasitology: the integrated study of infections,  
850 immunology, and genetics. Oxford University Press, Oxford, UK.

- 851 Streicker, D. G., A. Fenton, and A. B. Pedersen. 2013. Differential sources of host species  
852 heterogeneity influence the transmission and control of multihost parasites. *Ecology*  
853 *Letters* 16:975–984.
- 854 Tanaka, S., T. Nishida, and N. Ohsaki. 2007. Sequential rapid adaptation of indigenous  
855 parasitoid wasps to the invasive butterfly *Pieris brassicae*. *Evolution* 61:1791–1802.
- 856 Taylor, L. H., S. M. Latham, and M. E. J. Woolhouse. 2001. Risk factors for human disease  
857 emergence. *Philosophical Transactions of the Royal Society B: Biological Sciences*  
858 256:983–989.
- 859 Therneau, T. M. 2014. A Package for Survival Analysis in S.
- 860 Vale, P. F., M. Stjernman, and T. J. Little. 2008. Temperature-dependent costs of parasitism  
861 and maintenance of polymorphism under genotype-by-environment interactions. *Journal*  
862 *of Evolutionary Biology* 21:1418–1427.
- 863 Vale, P. F., A. J. Wilson, A. Best, M. Boots, and T. J. Little. 2011. Epidemiological,  
864 evolutionary, and coevolutionary implications of context-dependent parasitism. *The*  
865 *American Naturalist* 177:510–21.
- 866 Via, S., and D. J. Hawthorne. 2002. The genetic architecture of ecological specialization:  
867 correlated gene effects on host use and habitat choice in pea aphids. *The American*  
868 *Naturalist* 159:S76–S88.
- 869 Viana, M., R. Mancy, R. Biek, S. Cleaveland, P. C. Cross, J. O. Lloyd-Smith, and D. T.  
870 Haydon. 2014. Assembling evidence for identifying reservoirs of infection. *Trends in*  
871 *Ecology and Evolution* 29:270–279.
- 872 Walther, B. A., and P. W. Ewald. 2004. Pathogen survival in the external environment and  
873 the evolution of virulence. *Biological Reviews* 79:849–69.
- 874 Woolhouse, M. E. J., L. H. Taylor, and D. T. Haydon. 2001. Population Biology of Multihost  
875 Pathogens. *Science* 292:1109–1112.
- 876 Zbinden, M., C. R. Haag, and D. Ebert. 2008. Experimental evolution of field populations of  
877 *Daphnia magna* in response to parasite treatment. *Journal of Evolutionary Biology*  
878 21:1068–1078.
- 879 Zeileis, A., C. Kleiber, and S. Jackman. 2008. Regression Models for Count Data in R.  
880 *Journal of Statistical Software* 27:1–25.
- 881

882 **TABLES & FIGURES**

883 **Table 1. Number of replicates for the different treatments and blocks.** See ‘Methods – Experiment 2’ for  
 884 more information.

| Treatment:<br>[spore dose]        | Exposure to <i>A. rigaudi</i><br>[3 000 sp/i] |             | Exposure to <i>E. artemiae</i><br>[2 500 sp/i] |              | Exposure to <i>E. artemiae</i><br>[10 000 sp/i] |             | Controls |              |
|-----------------------------------|-----------------------------------------------|-------------|------------------------------------------------|--------------|-------------------------------------------------|-------------|----------|--------------|
|                                   | <b><i>A. franciscana</i></b>                  | <b>86 ♂</b> | <b>86 ♀</b>                                    | <b>132 ♂</b> | <b>132 ♀</b>                                    |             |          | <b>120 ♂</b> |
| Origin: Caitive Nord 2013         | 26 ♂                                          | 26 ♀        | 72 ♂                                           | 72 ♀         |                                                 |             | 60 ♂     | 60 ♀         |
| Origin: Caitive Nord 2014         | 30 ♂                                          | 30 ♀        | 30 ♂                                           | 30 ♀         |                                                 |             | 30 ♂     | 30 ♀         |
| Origin: Caitive Sud 2014          | 30 ♂                                          | 30 ♀        | 30 ♂                                           | 30 ♀         |                                                 |             | 30 ♂     | 30 ♀         |
| <b><i>A. parthenogenetica</i></b> |                                               | <b>96 ♀</b> |                                                | <b>96 ♀</b>  |                                                 | <b>33 ♀</b> |          | <b>96 ♀</b>  |
| Batch: 34 ± 2 days old            |                                               | 48 ♀        |                                                | 48 ♀         |                                                 | 18 ♀        |          | 48 ♀         |
| Batch: 26 ± 2 days old            |                                               | 48 ♀        |                                                | 48 ♀         |                                                 | 15 ♀        |          | 48 ♀         |

885

886 **Table 3. Detection of infection before and after the detection threshold.** The table shows the detected  
 887 infection rates in individuals that survived until we could be certain of their infection status (i.e. that died after  
 888 the detection threshold on day 15) vs. individuals that died before this threshold day.

| Host-parasite combination                        | Infection rate after vs. before the detection threshold |      |
|--------------------------------------------------|---------------------------------------------------------|------|
| <b><i>A. franciscana</i></b>                     |                                                         |      |
| Exposure to <i>A. rigaudi</i>                    | 86 %                                                    | 50 % |
| Exposure to <i>E. artemiae</i>                   | 96 %                                                    | 13 % |
| <b><i>A. parthenogenetica</i></b>                |                                                         |      |
| Exposure to <i>A. rigaudi</i>                    | 100 %                                                   | 15 % |
| Exposure to <i>E. artemiae</i> – low spore dose  | 64 %                                                    | 0 %  |
| Exposure to <i>E. artemiae</i> – high spore dose | 86 %                                                    | 20 % |

889

890 **Table 2. Overview of statistical analyses.** See Supplementary Material for details.

| Tested variable                                                                                                                | Statistical models and tests                       | Fixed-effect terms in the full model                                                                         | Random/Fraily terms                                         |
|--------------------------------------------------------------------------------------------------------------------------------|----------------------------------------------------|--------------------------------------------------------------------------------------------------------------|-------------------------------------------------------------|
| <b>Virulence of infections: <i>A. franciscana</i> and <i>A. parthenogenetica</i> analyzed separately</b>                       |                                                    |                                                                                                              |                                                             |
| <b>Survival</b>                                                                                                                | Survival models <sup>1</sup> + LRT + Dunnett p.-h. | Treatment <sup>2</sup> , Sex ( <i>A. f.</i> ), Size class, double interactions                               | Origin ( <i>A. f.</i> ), Batch ( <i>A. p.</i> )             |
| <b>Growth between days 1 &amp; 30</b> <sup>3</sup>                                                                             | LMM + LRT + Dunnett p.-h.                          | Treatment <sup>2</sup> * Sex ( <i>A. f.</i> ) * Size class                                                   | Origin ( <i>A. f.</i> ), Batch ( <i>A. p.</i> )             |
| <b>Reproduction</b>                                                                                                            |                                                    |                                                                                                              |                                                             |
| Time until sexual maturity                                                                                                     | Survival models <sup>1</sup> + LRT + Dunnett p.-h. | Treatment <sup>2</sup> * Size class                                                                          | Origin ( <i>A. f.</i> ), Batch ( <i>A. p.</i> )             |
| Probability of producing a clutch                                                                                              | Bernouilli GLMM + LRT + Dunnett p.-h.              | Treatment <sup>2</sup> * Size class                                                                          | Origin ( <i>A. f.</i> ), Batch ( <i>A. p.</i> )             |
| Rate of offspring production <sup>4,5,a</sup>                                                                                  | LMM + LRT + Dunnett p.-h.                          | Treatment <sup>2</sup> * Size class                                                                          | Origin ( <i>A. f.</i> ), Batch ( <i>A. p.</i> )             |
| Timing of offspring production <sup>4,6,a</sup>                                                                                | Neg. binomial GLMM + LRT + Dunnett p.-h.           | Treatment <sup>2</sup> * (Elapsed % of reproductive period + Elapsed % of reproductive period <sup>2</sup> ) | Individual, Origin ( <i>A. f.</i> ), Batch ( <i>A. p.</i> ) |
| Type of offspring produced <sup>a</sup>                                                                                        | Binomial GLMM + LRT + Dunnett p.-h.                | Treatment <sup>2</sup> * Size class                                                                          | Origin ( <i>A. f.</i> ), Batch ( <i>A. p.</i> )             |
| <b>Fitness (Lifetime reproductive success)</b> <sup>4,7</sup>                                                                  | Neg. binomial hurdle models + LRT + Dunnett p.-h.  | Treatment <sup>2</sup> * Size class                                                                          | NA                                                          |
| <b>Parasite transmission and fitness: infections of <i>A. franciscana</i> and <i>A. parthenogenetica</i> analyzed together</b> |                                                    |                                                                                                              |                                                             |
| <b>Infectiousness of one spore, <math>\rho</math></b>                                                                          | LMM + LRT + Tukey p.-h.                            | Recipient sp. * Parasite sp.                                                                                 | Individual                                                  |
| <b>Spore production rate</b> <sup>b</sup>                                                                                      |                                                    |                                                                                                              |                                                             |
| Spore count <sup>8,c</sup>                                                                                                     | Neg. binomial GLMM + LRT + Tukey p.-h.             | Host sp. * Parasite sp.                                                                                      | Individual                                                  |
| Spore count ~ dose <sup>8,d</sup>                                                                                              | Neg. binomial GLMM + LRT                           | Dose                                                                                                         | Individual                                                  |
| <b>Fitness</b> <sup>b</sup>                                                                                                    |                                                    |                                                                                                              |                                                             |
| Lifetime transmission success                                                                                                  | Kruskal-Wallis tests + Dunn p.-h.                  | Host-parasite combination <sup>2</sup>                                                                       | NA                                                          |
| Asymptotic growth rate                                                                                                         | Kruskal-Wallis tests + Dunn p.-h.                  | Host-parasite combination <sup>2</sup>                                                                       | NA                                                          |

891 **Notes:** <sup>1</sup>Survival models were parametric; the best survival distribution was chosen by AICc. <sup>2</sup>*A. parthenogenetica* exposed to low and high doses of *E. artemiae* treated  
892 separately. <sup>3</sup>Most host growth occurred between days 1 and 30 (Supp. Table 2), so only this period was analyzed further. <sup>4</sup>Offspring could be nauplii or cysts. These two  
893 offspring types were not directly comparable: they probably require different amounts of energy to produce, and we allowed mortality to occur before counting nauplii. To  
894 account for this, we repeated the tests with nauplii weighted twice, equally, or half as much as cysts, and based our conclusions on the overall pattern. <sup>5</sup>Rate of offspring  
895 production = total number of offspring / length of the reproductive period. The length of the reproductive period was the difference between the date of death (or  
896 censoring) and the date of sexual maturity. <sup>5</sup>Modeled as clutch size as a function of the elapsed proportion of the reproductive period. The reproductive period started at  
897 sexual maturity and ended at death (or censoring). <sup>7</sup>LRS calculated as the total number of offspring produced over the study period. <sup>8</sup>Spore count = the number of spores  
898 counted in the fecal sample; we did not transform the spore count to spores/mL ( $\approx$  spore count \* 700) to avoid skewing the error distribution.

899 **Subsets:** <sup>a</sup> Only for females that produced at least 1 clutch. <sup>b</sup> Analyzed for infected individuals only. <sup>c</sup> Excluded *A. p.* exposed to high doses of *E. artemiae*. <sup>d</sup> Only for *A. p.*  
900 infected with *E. artemiae*.

901 **Abbreviations:** GLMM, generalized linear mixed models. LMM, linear mixed models. LRT, likelihood ratio testing. p.-h., post-hoc tests. *A. f.*, *A. franciscana*. *A. p.*, *A.*  
902 *parthenogenetica*. sp., species. \*, interactions between the factors were included. NA, not applicable.

903 **Table 4. Significance of tested effects for the virulence of infections.** Analyses were run separately for *A.*  
904 *franciscana* and *A. parthenogenetica*. See text for post-hoc analyses of Treatment.

| Tested variable                                            | Fixed-effect terms       | test statistic, <i>p</i>              | Effect                     |
|------------------------------------------------------------|--------------------------|---------------------------------------|----------------------------|
| <b>Virulence of infections: <i>A. franciscana</i></b>      |                          |                                       |                            |
| <b>Survival</b>                                            | Treatment                | $\chi^2(2) = 48.2, p < 0.0001$        | ↓ when infected            |
|                                                            | Sex                      | $\chi^2(1) = 33.2, p < 0.0001$        | ↑ for males                |
|                                                            | Size class               | $\chi^2(1) = 4.3, p = 0.04$           | ↑ for larger individuals   |
|                                                            | interactions             | all non-significant                   |                            |
| <b>Growth between days 1 &amp; 30</b>                      | Treatment                | $\chi^2(2) = 9.7, p < 0.01$           |                            |
|                                                            | Sex                      | $\chi^2(1) = 133.5, p < 0.0001$       | ↓ for males                |
|                                                            | Size class               | $\chi^2(1) = 95.0, p < 0.0001$        | ↓ for larger individuals   |
|                                                            | interactions             | all non-significant                   |                            |
| <b>Reproduction</b>                                        |                          |                                       |                            |
| Time until sexual maturity                                 | Treatment                | $\chi^2(2) = 22.5, p < 0.0001$        | ↑ when infected            |
|                                                            | Size class               | $\chi^2(1) = 0.1, p = 0.83$           |                            |
|                                                            | interaction              | $\chi^2(2) = 1.3, p = 0.54$           |                            |
| Probability of producing a clutch                          | Treatment                | $\chi^2(2) = 31.3, p < 0.0001$        | ↓ when infected            |
|                                                            | Size class               | $\chi^2(1) = 0.5, p = 0.50$           |                            |
|                                                            | interaction              | $\chi^2(2) = 0.8, p = 0.69$           |                            |
| Rate of offspring production                               | Treatment                | $\chi^2(2) \geq 7.9, p \leq 0.02$ †   | ↓ when infected            |
|                                                            | Size class               | $\chi^2(1) \leq 0.5, p \geq 0.50$ †   |                            |
|                                                            | interaction              | $\chi^2(2) \leq 1.8, p \geq 0.41$ †   |                            |
| Timing of offspring production                             | Treatm. : % Repr. period | $\chi^2(4) \leq 3.7, p \geq 0.45$ †   |                            |
| Type of offspring produced                                 | Treatment                | $\chi^2(2) = 16.8, p < 0.001$         | more nauplii when infected |
|                                                            | Size class               | $\chi^2(1) = 0.1, p = 0.73$           |                            |
|                                                            | interaction              | $\chi^2(2) = 0.7, p = 0.71$           |                            |
| <b>Fitness (LRS)</b>                                       | Treatment                | $\chi^2(4) \geq 46.6, p < 0.0001$ †   | ↓ when infected            |
|                                                            | Size class               | $\chi^2(2) \leq 1.5, p \geq 0.48$ †   |                            |
|                                                            | Interaction              | $\chi^2(4) \leq 1.5, p \geq 0.82$ †   |                            |
| <b>Virulence of infections: <i>A. parthenogenetica</i></b> |                          |                                       |                            |
| <b>Survival</b>                                            | Treatment                | $\chi^2(3) = 19.7, p < 0.001$         | ↓ when infected            |
|                                                            | Size class               | $\chi^2(2) = 11.5, p < 0.01$          | ↑ for larger individuals   |
|                                                            | interaction              | see text                              |                            |
| <b>Growth between days 1 &amp; 30</b>                      | Treatment                | $\chi^2(3) = 1.3, p = 0.73$           |                            |
|                                                            | Size class               | $\chi^2(2) = 35.8, p < 0.0001$        | ↓ for larger individuals   |
|                                                            | interaction              | $\chi^2(6) = 13.1, p = 0.04$          | see text                   |
| <b>Reproduction</b>                                        |                          |                                       |                            |
| Rate of offspring production                               | Treatment                | $\chi^2(3) \leq 5.8, p > 0.12$ †      |                            |
|                                                            | Size class               | $\chi^2(2) \geq 8.8, p = 0.01$ †      | ↑ for larger individuals   |
|                                                            | interaction              | $\chi^2(6) \leq 10.4, p \geq 0.11$ †  |                            |
| Timing of offspring production                             | Treatm. : % Repr. period | $\chi^2(4) \geq 10.4, p < 0.11$ †     | earlier when infected      |
| Type of offspring produced                                 | Treatment                | $\chi^2(2) = 1.4, p = 0.71$           |                            |
|                                                            | Size class               | $\chi^2(2) = 0.1, p = 0.96$           |                            |
|                                                            | interaction              | $\chi^2(6) = 9.1, p = 0.17$           |                            |
| <b>Fitness (LRS)</b>                                       | Treatment                | $\chi^2(6) \leq 5.6, p \geq 0.13$ †   |                            |
|                                                            | Size class               | $\chi^2(4) \geq 8.2, p < 0.09$ †      | ↓ for largest individuals  |
|                                                            | interaction              | $\chi^2(12) \leq 13.8, p \geq 0.31$ † |                            |

905 †Depending on the weight of nauplii vs. cysts.

906 **Table 5. Number of exposed individuals that were infected or resistant to *A. rigaudi* and *E. artemiae*.** These  
 907 counts excluded all individuals who died before infection status could be definitively determined, i.e. those  
 908 that died before day 15 of the experiment.

| Host-parasite combination                       | Resistant | Infected | % Resistant |
|-------------------------------------------------|-----------|----------|-------------|
| <b><i>A. franciscana</i> males</b>              |           |          |             |
| Exposure to <i>A. rigaudi</i>                   | 8         | 59       | 12%         |
| Exposure to <i>E. artemiae</i>                  | 5         | 106      | 5%          |
| <b><i>A. franciscana</i> females</b>            |           |          |             |
| Exposure to <i>A. rigaudi</i>                   | 12        | 60       | 17%         |
| Exposure to <i>E. artemiae</i>                  | 5         | 114      | 4%          |
| <b><i>A. parthenogenetica</i></b>               |           |          |             |
| Exposure to <i>A. rigaudi</i>                   | 0         | 62       | 0%          |
| Exposure to <i>E. artemiae</i> – low spore dose | 27        | 49       | 36%         |
| – high spore dose                               | 4         | 25       | 14%         |

909

910 **Table 6.** Qualitative synopsis of results.

| Host species                      | Parasite species                                                                                                                                                          |                                                                                                                                                           |
|-----------------------------------|---------------------------------------------------------------------------------------------------------------------------------------------------------------------------|-----------------------------------------------------------------------------------------------------------------------------------------------------------|
|                                   | <i>A. rigaudi</i>                                                                                                                                                         | <i>E. artemiae</i>                                                                                                                                        |
| <b><i>A. franciscana</i></b>      | moderately infectious<br>low spore production<br>highly virulent<br>⇒ <b>low parasite fitness,<br/>                     mismatched host &amp; parasite</b>                | highly infectious<br>high spore production<br>moderately virulent<br>⇒ <b>high parasite fitness,<br/>                     matched host &amp; parasite</b> |
| <b><i>A. parthenogenetica</i></b> | highly infectious<br>high spore production<br>moderately virulent (survival only)<br>⇒ <b>high parasite fitness,<br/>                     matched host &amp; parasite</b> | poorly infectious<br>low spore production<br>avirulent<br>⇒ <b>low parasite fitness,<br/>                     mismatched host &amp; parasite</b>          |

911



912 **Figure 1. Infectivity of *A. rigaudi* (blue) and *E. artemiae* (red) in *A. franciscana* (left) and *A. parthenogenetica***  
913 **(right).** Points indicate the prevalence (% infected) at each dose; lines are the best fits and the shaded areas  
914 represent the 95% CIs. Because the inflection point of *E. artemiae* in *A. franciscana* was poorly resolved,  
915 uncertainty was high here. It was not possible to calculate a confidence interval for *E. artemiae* in *A.*  
916 *parthenogenetica* due to low resolution.

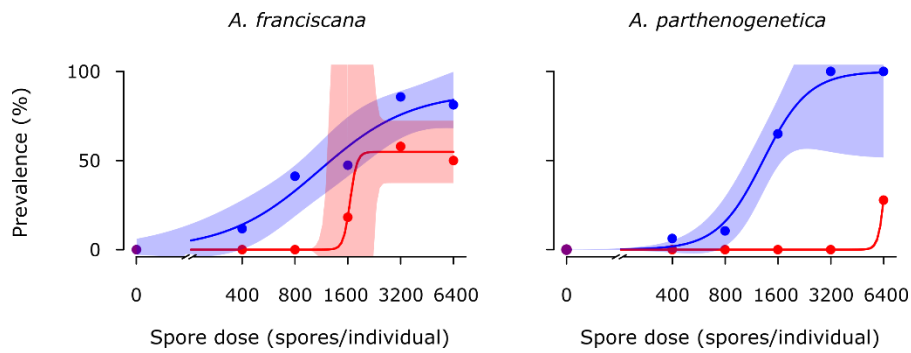

917

918

919 **Figure 2. Host fitness ( $\approx$  parasite virulence) in the four host-parasite combinations.** All factors are shown as  
 920 fitted effects relative to controls: survival is an acceleration factor (the ratio of expected time-until-death); the  
 921 probability of reproduction is a relative risk; growth, rate of offspring production, and LRS are ratios. Bars  
 922 represent the 95% profile likelihood CIs (survival) or bootstrapped CIs (all others). *A. parthenogenetica*  
 923 infected after exposure to 10000 *E. artemiae* spores are indicated with open circles. Asterisks indicate  
 924 significant differences from controls (represented by the dotted gray line).  
 925 The plotted survival effect for *A. parthenogenetica* excludes the aberrant group (see Results). All reproductive  
 926 and fitness traits were obtained for females only. The probability of reproduction is not shown for *A.*  
 927 *parthenogenetica* because it could not be analyzed. Weighing the contributions of nauplii and cysts to the rate  
 928 of offspring production and LRS generated qualitatively equivalent results; the results shown here are for  
 929 equal weights.

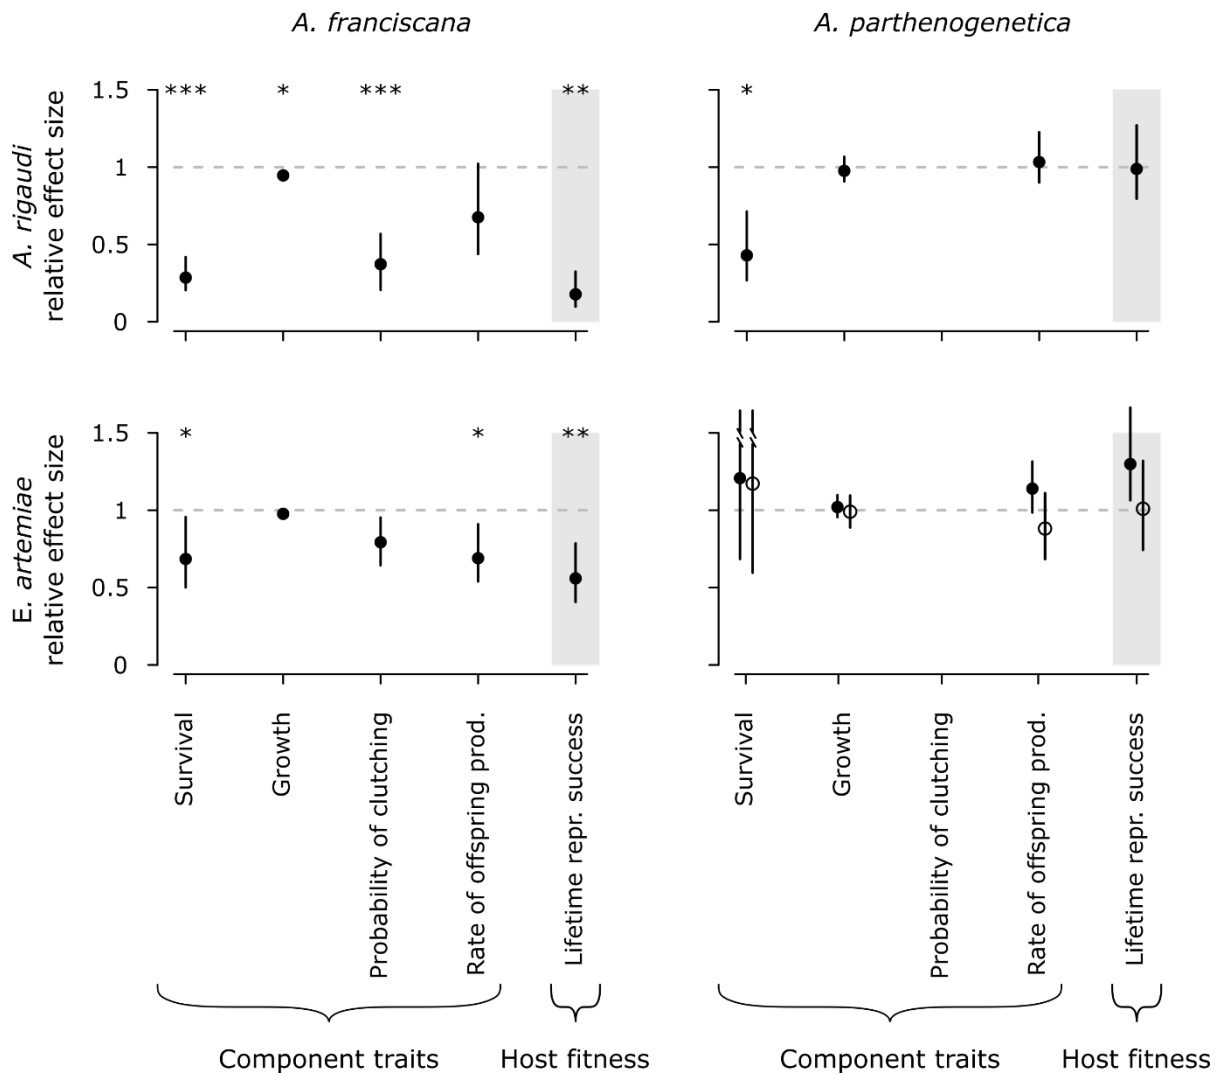

930

931

932 **Figure 3. Timing of reproduction in *A. parthenogenetica* controls (black) and infected with *A. rigaudi* (blue).**  
933 Lines represent the prediction of the best model, points and vertical bars give the observed means and their  
934 95% CIs, calculated over intervals of 10%. Weighing the contributions of nauplii and cysts to the total number  
935 of offspring generated qualitatively similar results; the results shown here are for equal weights.

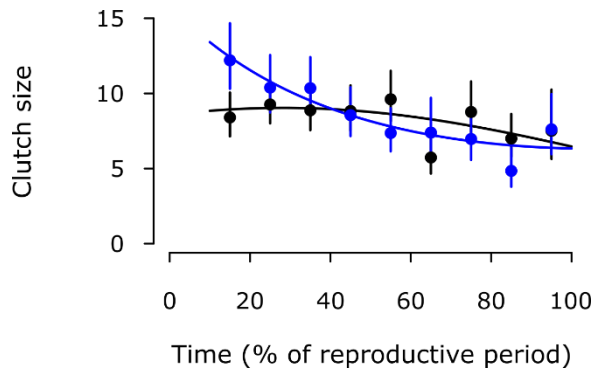

936

937

938 **Figure 4. Parasite fitness in the four host-parasite combinations.** The component traits infectiousness  
 939 (probability of infection by a single spore), rate of spore production (# counted spores/5 days,  $\ln$  scale), and  
 940 host survival (which determines infection duration, copied from Fig. 2) are shown as fitted means with 95%  
 941 profile likelihood CIs. The fitness measures lifetime transmission success ( $\ln + 1$  scale) and asymptotic growth  
 942 rate ( $\ln + 1$  scale) are shown as Tukey box plots. *A. parthenogenetica* infected after exposure to 10000 *E.*  
 943 *artemiae* spores are indicated with open circles and dotted box plots. Note that spore production, host  
 944 survival, and parasite fitness were analyzed for infected hosts only.

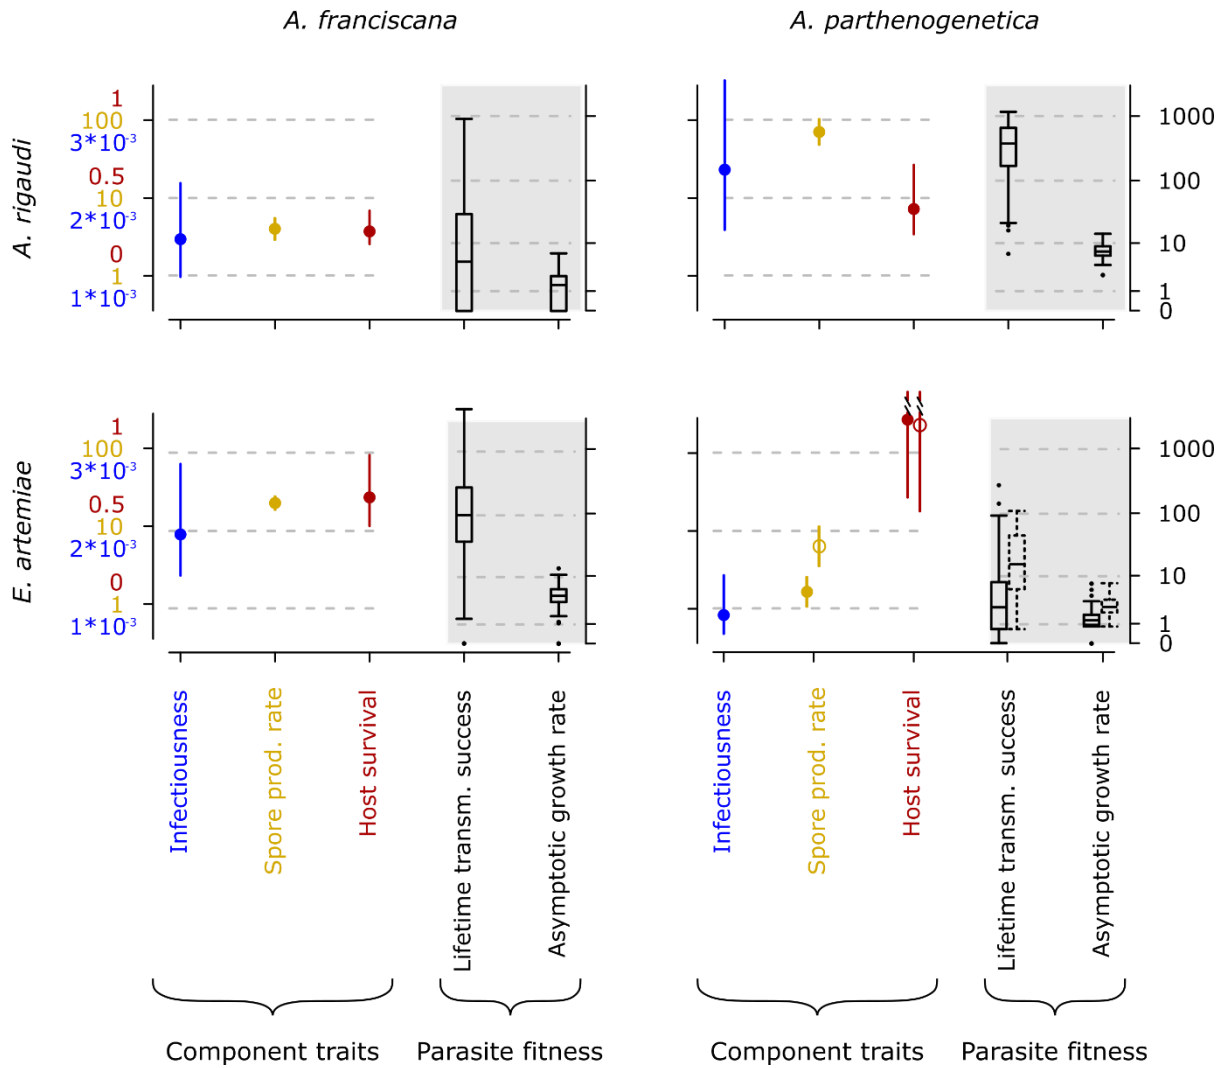

945

946 **Figure 5. Survival curves for resistant (orange), infected (green), and control (black) individuals.** Note that  
 947 these curves start at day 15, i.e. when infection status could be fully ascertained. The curves shown here are  
 948 averaged across size class and origin for *A. franciscana* and across size classes in *A. parthenogenetica*. Model  
 949 estimates for each curve are plotted in gray.

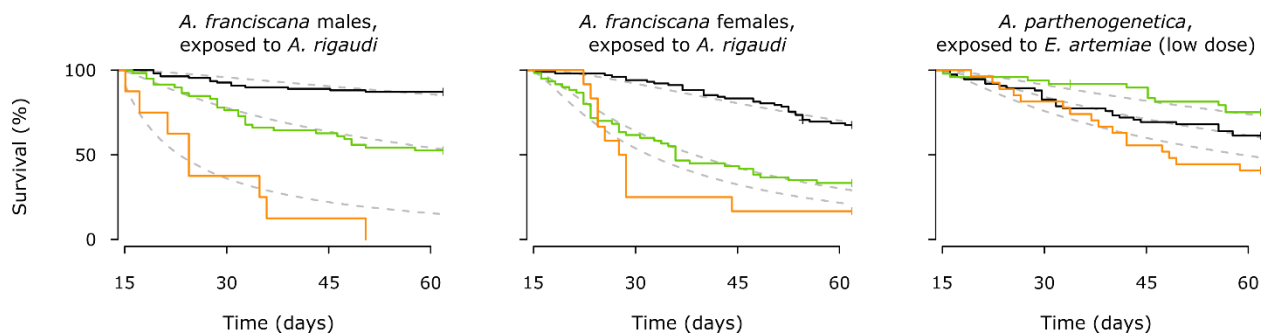

950

44

## SUPPLEMENTARY MATERIAL

**Supplementary Table 1.** Host survival during the infectivity experiment.

| Parasite species                  | Dose (spores/individual) | Nb. exposed | Nb. died | % Survived |
|-----------------------------------|--------------------------|-------------|----------|------------|
| <b><i>A. franciscana</i></b>      |                          |             |          |            |
| Controls                          | 0                        | 17          | 7        | 59%        |
| <i>A. rigaudi</i>                 | 400                      | 20          | 3        | 85%        |
|                                   | 800                      | 20          | 3        | 85%        |
|                                   | 1 600                    | 20          | 1        | 95%        |
|                                   | 3 200                    | 20          | 6        | 70%        |
|                                   | 6 400                    | 20          | 4        | 80%        |
| <i>E. artemiae</i>                | 400                      | 20          | 10       | 50%        |
|                                   | 800                      | 20          | 4        | 80%        |
|                                   | 1 600                    | 20          | 9        | 55%        |
|                                   | 3 200                    | 20          | 1        | 95%        |
|                                   | 6 400                    | 20          | 8        | 60%        |
| <b><i>A. parthenogenetica</i></b> |                          |             |          |            |
| Controls                          | 0                        | 4           | 0        | 100%       |
| <i>A. rigaudi</i>                 | 400                      | 16          | 0        | 100%       |
|                                   | 800                      | 20          | 1        | 95%        |
|                                   | 1 600                    | 20          | 0        | 100%       |
|                                   | 3 200                    | 8           | 0        | 100%       |
|                                   | 6 400                    | 4           | 0        | 100%       |
| <i>E. artemiae</i>                | 400                      | 20          | 2        | 90%        |
|                                   | 800                      | 20          | 0        | 100%       |
|                                   | 1 600                    | 20          | 1        | 95%        |
|                                   | 3 200                    | 20          | 2        | 90%        |
|                                   | 6 400                    | 20          | 2        | 90%        |

**Supplementary Table 2.** Results of paired t-tests comparing host growth before and after day 30 (all treatments combined).

| Hosts                                | Mean difference | p (mean difference $\neq$ 0) |
|--------------------------------------|-----------------|------------------------------|
| <b><i>A. franciscana</i> males</b>   |                 |                              |
| Growth between days 1 & 30           | 2.1             | < 0.0001                     |
| Growth between days 30 & 60          | 0.0             | 0.87                         |
| <b><i>A. franciscana</i> females</b> |                 |                              |
| Growth between days 1 & 30           | 2.8             | < 0.0001                     |
| Growth between days 30 & 60          | 0.3             | < 0.0001                     |
| <b><i>A. parthenogenetica</i></b>    |                 |                              |
| Growth between days 1 & 30           | 1.7             | < 0.0001                     |
| Growth between days 30 & 60          | 0.3             | < 0.0001                     |



| Host-parasite combination                                                                               | AICc   | ΔAICc | w    |
|---------------------------------------------------------------------------------------------------------|--------|-------|------|
| <b>A. franciscana exposed to A. rigaudi: time until sexual maturity</b>                                 |        |       |      |
| Base model + Res-Inf-Ctrl                                                                               | 951.6  | 0     | 0.82 |
| Contrast manipulation: <i>Inf=Res&gt;Ctrl</i>                                                           | 949.7  |       |      |
| <i>Inf&gt;Res&gt;Ctrl</i>                                                                               | 951.8  |       |      |
| <i>Inf&gt;Res=Inf</i>                                                                                   | 953.2  |       |      |
| Base model + Res-Inf-Ctrl + Res-Inf-Ctrl : Size class                                                   | 954.6  | 3.0   | 0.18 |
| Base model                                                                                              | 974.4  | 22.8  | 0.00 |
| <b>A. franciscana exposed to A. rigaudi: probability of reproduction†</b>                               |        |       |      |
| Base model + Res-Inf-Ctrl                                                                               | 205.5  | 0     | 0.75 |
| Contrast manipulation: <i>Ctrl&gt;Inf=Res</i>                                                           | 204.0  |       |      |
| <i>Ctrl&gt;Inf&gt;Res</i>                                                                               | 205.5  |       |      |
| Base model + Res-Inf-Ctrl + Res-Inf-Ctrl : Size class                                                   | 207.8  | 2.3   | 0.24 |
| Base model                                                                                              | 239.9  | 34.4  | 0.00 |
| <b>A. franciscana exposed to A. rigaudi: clutch type (higher = more nauplii)†</b>                       |        |       |      |
| Base model + Res-Inf-Ctrl                                                                               | 306.7  | 0     | 1.00 |
| Contrast manipulation: <i>Res&gt;Inf&gt;Ctrl</i>                                                        | 306.7  |       |      |
| <i>Res=Inf&gt;Ctrl</i>                                                                                  | 307.3  |       |      |
| Base model                                                                                              | 326.4  | 19.7  | 0.00 |
| <b>A. franciscana exposed to A. rigaudi: rate of offspring production*†</b>                             |        |       |      |
| Base model + Res-Inf-Ctrl                                                                               | 96.0   | 0     | 0.66 |
| Contrast manipulation: <i>Res&gt;Ctrl=Inf</i>                                                           | 95.4   |       |      |
| <i>Res&gt;Ctrl&gt;Inf</i>                                                                               | 96.0   |       |      |
| <i>Res=Ctrl&gt;Inf</i>                                                                                  | 98.2   |       |      |
| Base model                                                                                              | 98.3   | 2.3   | 0.21 |
| Base model + Res-Inf-Ctrl + Res-Inf-Ctrl : Size class                                                   | 99.3   | 3.3   | 0.13 |
| <b>A. franciscana exposed to A. rigaudi: Fitness (LRS)*†</b>                                            |        |       |      |
| Base model + Res-Inf-Ctrl                                                                               | 1094.0 | 0     | 1.00 |
| Contrast manipulation: <i>Ctrl&gt;Res=Inf</i>                                                           | 1095.5 |       |      |
| <i>Ctrl&gt;Res&gt;Inf</i>                                                                               | 1097.6 |       |      |
| Base model                                                                                              | 1145.7 | 51.7  | 0.00 |
| Base model + Res-Inf-Ctrl + Res-Inf-Ctrl : Size class                                                   | -      | -     | -    |
| <b>A. parthenogenetica exposed to E. artemiae - low spore dose: clutch type (higher = more nauplii)</b> |        |       |      |
| Base model + Res-Inf-Ctrl+ Res-Inf-Ctrl : Size class                                                    | 315.6  | 0     | 0.76 |
| Contrast manipulation: <i>order of effects dependent on Size class</i>                                  | 313.3  |       |      |
| <i>order of effects dependent on Size class</i>                                                         | 313.4  |       |      |
| <i>order of effects dependent on Size class</i>                                                         | 315.6  |       |      |
| Base model + Res-Inf-Ctrl                                                                               | 318.3  | 2.7   | 0.20 |
| Base model                                                                                              | 321.2  | 5.6   | 0.05 |
| <b>A. parthenogenetica exposed to E. artemiae - low spore dose: rate of offspring production*</b>       |        |       |      |
| Base model                                                                                              | 181.1  | 0     | 0.96 |
| Base model + Res-Inf-Ctrl                                                                               | 187.3  | 6.2   | 0.04 |
| Base model + Res-Inf-Ctrl + Res-Inf-Ctrl : Size class                                                   | 196.9  | 15.8  | 0.00 |
| <b>A. franciscana exposed to A. rigaudi: Fitness (LRS)*</b>                                             |        |       |      |
| Base model + Res-Inf-Ctrl                                                                               | 1443.2 | 0     | 0.86 |
| Contrast manipulation: <i>Inf&gt;Res=Ctrl</i>                                                           | 1441.4 |       |      |
| <i>Inf=Res&gt;Ctrl</i>                                                                                  | 1441.8 |       |      |
| <i>Inf&gt;Res&gt;Ctrl</i>                                                                               | 1443.2 |       |      |
| Base model + Res-Inf-Ctrl + Res-Inf-Ctrl : Size class                                                   | 1446.8 | 3.6   | 0.14 |
| Base model                                                                                              | 1466.5 | 23.3  | 0.00 |

\*Shown for the models that weighted nauplii and cysts equally; giving either offspring type a double weight produces qualitatively equivalent results. †Only two resistant females reproduced, so these results should be interpreted with caution.

**Supplementary Figure 1. Spore production and host-to-host transmission success in the four host-parasite combinations.** These graphs relate the infection success (percentage of recipients infected) to the spore count in the corresponding spore sample ( $\ln + 1$  scale) for *A. rigaudi* (top) and *E. artemiae* (bottom). Note that the graphs are divided by recipient species, not donor species (see Methods). Each point represents a recipient group; overlapping points shade to black. Lines represent 2<sup>nd</sup>-degree polynomial local regression (LOESS) fittings.

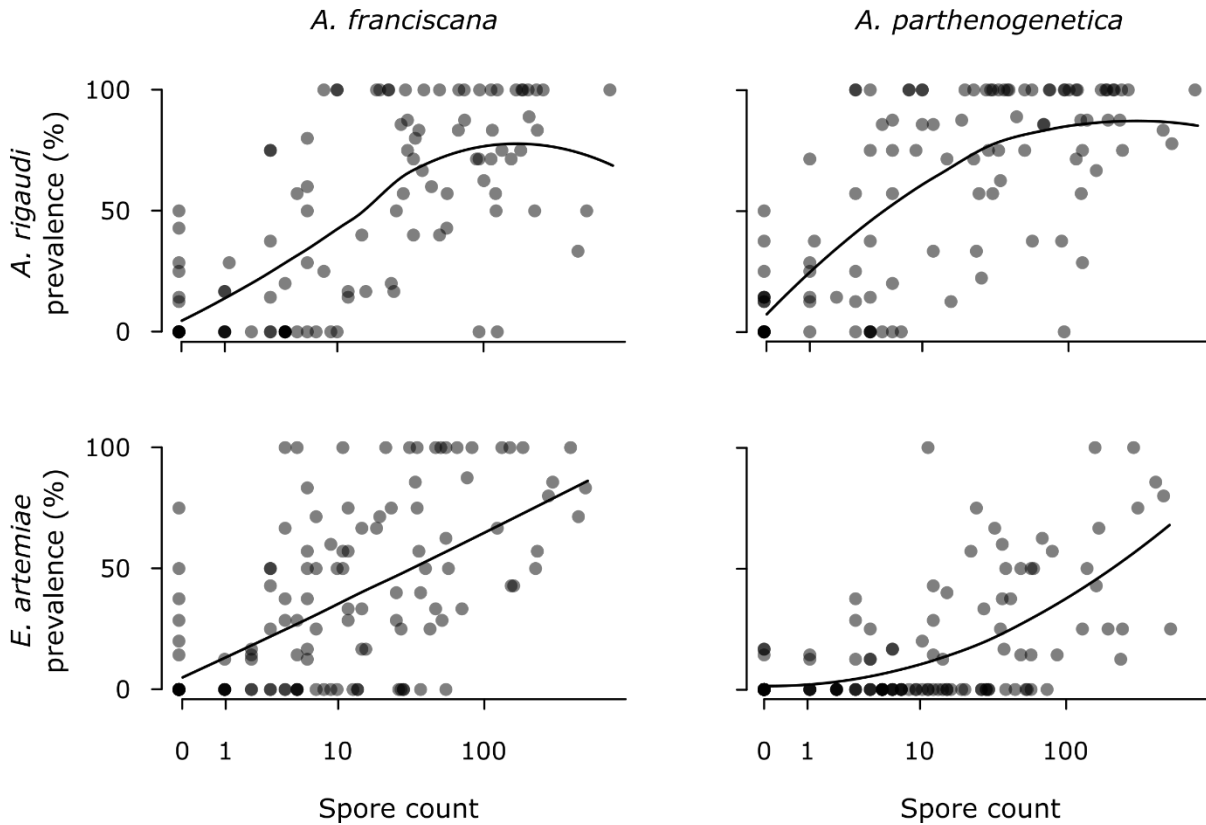



**Supplementary Figure 2. Overall fitness measures of *A. rigaudi* (top) and *E. artemiae* (bottom) infections.**

The asymptotic growth rate ( $\ln + 1$  scale) is shown as a function of the lifetime transmission success ( $\ln + 1$  scale). The asymptotic growth rate should be maximized during epidemics, while the lifetime transmission success, as an estimator of  $R_0$ , should be maximized in endemic conditions. The median, first and third quartiles are shown by boxplots on the axes. For *A. parthenogenetica* infected with *E. artemiae*, the open circles and boxplot represent the females exposed to a high spore dose. Each point represents an infected host; overlapping points shade to black.

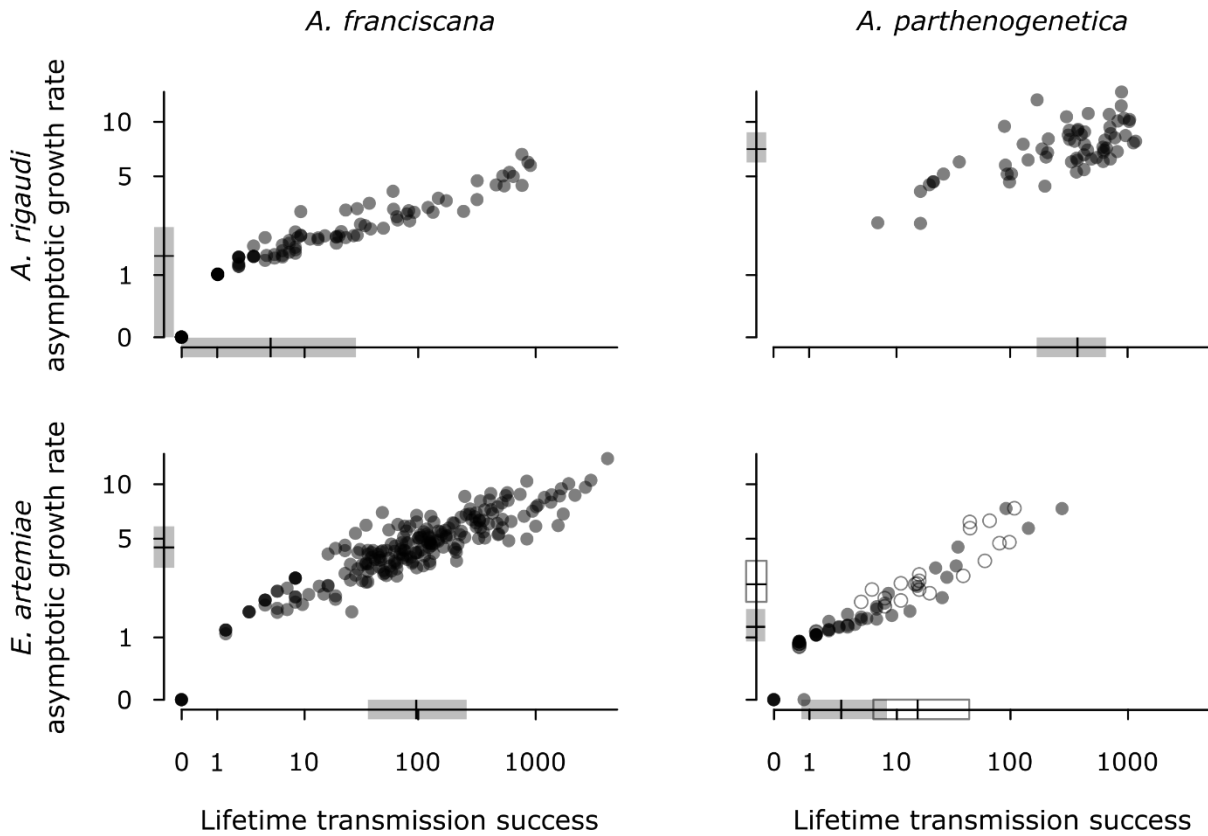

## Supplementary methods

### *Detailed description of analyses in Table 2 (Methods > Experiment 2: Virulence and transmission > Statistical analyses: virulence & transmission)*

First, we analyzed the virulence of infections (effect of the parasite on host survival, growth, reproduction, and overall fitness). This was done separately for *A. franciscana* and *A. parthenogenetica*. *A. parthenogenetica* exposed to low and high doses of *E. artemiae* were treated as separate treatments. Unless otherwise specified, our analyses proceeded as follows: we included our experimentally manipulated factors in a full regression model, used likelihood ratio tests to test their significance, and where relevant carried out post-hoc comparisons using Dunnett's comparisons with a control (i.e. infected-with-*A. rigaudi* vs. controls, infected-with-*E. artemiae* vs. controls). Importantly, we only analyzed virulence once we could be certain of individuals' infection status. To do this, we excluded all individuals that died before day 15 (see Methods > Experiment 2: Virulence and transmission > Experimental design and execution), and only compared infected with control individuals. To make sure that we were not missing important events occurring before this cutoff, we repeated all statistical models for exposed vs. control individuals that died before day 15.

We analyzed host survival using parametric survival models. We established a full fixed-effects model for each host species, then determined the best-fitting parametric distribution (Weibull, exponential, extreme, Gaussian, logistic, lognormal, log-logistic, Rayleigh) using the corrected AIC (Hurvich and Tsai 1989). We then tested the significance of the predictive effects as described above. Finally, we confirmed the fit of the model by performing a goodness-of-fit test (comparing the likelihood of the observed data with the likelihood distribution of simulated datasets based on the model predictions). The full model for *A. franciscana* included *Treatment*, *Sex*, *Size class*, and all double interactions. The full model for *A. parthenogenetica* included *Treatment*, *Size class*, and their interaction. *Origin* and *Batch* were included as frailty components for *A. franciscana* and *A. parthenogenetica*, respectively, as they could introduce heterogeneity in mortality rates. Data were right-censored on day 60.

To test the effects of parasite infection on growth, we first checked whether there was significant growth between days 1 & 30 and days 30 & 60 (paired t-tests of the size difference between day 30 & 1 and day 60 & 30). Most growth occurred during the first month (see Results), so we analyzed growth between days 1 & 30 further using linear mixed models. For *A. franciscana*, we looked at the effects of the fixed effects *Sex*, *Treatment*, *Size class* and all their interactions, with *Origin* as a random effect. For *A. parthenogenetica*, the full model included *Treatment*, *Size class* and their interaction as fixed effects, and *Batch* as a random effect.

To analyze (female) reproductive success, we decomposed female reproduction into a) time until sexual maturity, b) the probability of producing a clutch, c) the rate of offspring production, d) the timing of offspring production, and e) the type of offspring produced. All models included *Treatment*, *Size class*, and their interaction as fixed effects, and *Origin* or *Batch* as random (or frailty) effects. The response variables and statistical models were as follows. a) Time until sexual maturity: the number of days until females became sexually mature, analyzed using parametric survival models. As above, we first determined the best survival distributions to use, then tested the significance of the predictive effects. Females were right-censored in case of death. b) Probability of producing a clutch: a binary variable describing whether a female produced a clutch during the experiment or not, analyzed using generalized linear mixed models with a Bernoulli distribution. c) Rate of offspring production: for females that produced at least one clutch, the total number of offspring divided by the length of the reproductive period. The length of the reproductive period was

defined as the difference between the date of death (or censoring) and the date of maturity. The data were analyzed using linear mixed models. Offspring could be nauplii or cysts, and these two offspring types were not directly comparable (they probably require different amounts of energy to produce, and we allowed mortality to occur before counting nauplii). To account for this, we repeated the analyses with nauplii weighted twice, equally, or half as much as cysts, and based our conclusions on the overall pattern. d) Timing of offspring production: for females that produced at least one clutch, the clutch size through time. Clutch size was modelled as a quadratic function of clutch date, with clutch date expressed as the elapsed proportion of the female's reproductive period (e.g. for two females reproducing on the 10<sup>th</sup> day of sexual maturity, where one died on the 20<sup>th</sup> day and one was censored on the 40<sup>th</sup>, the elapsed proportions would be 0.5 and 0.25). Timing was analyzed using generalized linear mixed models with a negative binomial distribution; *Individual* was included as a random variable to control for pseudoreplication. As in (c), we ran models where nauplii were weighted twice, equally, or half as much as cysts, and based our conclusions on the overall pattern. e) Type of offspring produced: for females that produced at least one clutch, a binomial combination of the number of clutches consisting of nauplii vs. cysts, analyzed using generalized linear mixed models.

As a final virulence measure, we estimated the fitness of (female) hosts. Our fitness proxy was the lifetime reproductive success (LRS), calculated as the total number of offspring produced over the study period. This produced a zero-inflated count distribution, to which we fit negative binomial hurdle models. The full models included *Treatment*, *Size class*, and their interaction as fixed effects; random effects (such as *Origin* and *Batch*) were not supported by the package. As above, we ran models where nauplii were weighted twice, equally, and half as much as cysts, and based our conclusions on the overall pattern.

Next, we analyzed the parasites' transmission (spore production rate, infectiousness of a single spore, and overall fitness). These analyses were combined for infections in *A. franciscana* and *A. parthenogenetica*. Unless otherwise specified, we included our experimentally manipulated factors in a full regression model, and used likelihood ratio tests to test their significance. If relevant, post-hoc comparisons were carried out using Tukey comparisons.

To estimate the infectiousness of a single spore, we used the results of the transmission assay. We assumed that the establishment of microsporidian infections follows an independent-action model with birth-death processes. This model assumes that a parasite population grows in the host until it reaches an infective threshold, at which point the infection is considered to be established (Schmid-Hempel 2011 pp. 225–6). In our assay, we considered that an infection was established when we could detect it; in other words, the infective threshold corresponded to the threshold for PCR detection (estimated at ~1000 spores inside the host's body, unpublished data). In these models, the probability per spore to start an infection,  $p$ , is equal to  $-\ln\left(\frac{\text{noninfected recipients}}{\text{total recipients}}\right)/D$  where  $D$  is the spore dose (Schmid-Hempel 2011 pp. 225–6). In our transmission assay,  $D$  can be approximated by the number of spores in the fecal sample taken from the donor at the start of the assay (= spore count transformed to spores/mL, or \* 700), divided by  $5*8 = 40$  (fecal samples accumulated over a 5-day period but we only exposed recipients for one day; the inoculum was shared amongst 8 recipients). We calculated a value of  $p$  for every replicate in the transmission assay;  $p$  was then analyzed using linear mixed models. The model included *Recipient species*, *Parasite species*, and their interaction as fixed effects; an *Individual*-level random effect was included to control for pseudoreplication (each donor host was used to infect a group of *A. franciscana* and a group of *A. parthenogenetica* recipients; some donors were also re-used in the transmission assays on day 30 and 60).

We then tested whether the rate of spore production was dependent on the host-parasite combination. We used *Spore count*, the number of spores counted in the fecal sample, as the response variable in a generalized linear mixed model with a negative binomial distribution. We did not transform the spore count to spores/mL ( $\approx$  spore count \* 700) to avoid skewing the error distribution. The fixed effects were *Host species*, *Parasite species*, and their interaction; an *Individual*-level random effect was included to control for pseudoreplication. To avoid comparing apples with oranges, we excluded *A. parthenogenetica* that had been exposed to 10 000 *E. artemiae* spores from this model. However, we tested separately whether the rate of spore production differed for *A. parthenogenetica* infected with different doses of *E. artemiae* (equivalent model with fixed effect *Dose*). Spore production analyses were carried out for infected hosts only.

As a final measure of parasite success, we investigated parasite fitness in the different host-parasite combinations. For each established infection (i.e. each infected host), we used two measures of spore production as proxies for parasite fitness. First, we calculated a proxy for the 'lifetime transmission success': we summed the number of spores in the fecal samples taken on days 15, 30, 45 and 60 for each infection, then corrected this cumulative spore count by  $p$ , the average infectiousness of a single spore in a given host-parasite combination (as calculated above). Second, we calculated an asymptotic growth rate by computing the dominant eigenvalue of a standard Leslie matrix,

$$\begin{bmatrix} 0 & n_{15} * p & n_{30} * p & n_{45} * p & n_{60} * p \\ s_{15} & 0 & 0 & 0 & 0 \\ 0 & s_{30} & 0 & 0 & 0 \\ 0 & 0 & s_{45} & 0 & 0 \\ 0 & 0 & 0 & s_{60} & 0 \end{bmatrix},$$

where  $n_i$  is the number of spores in the fecal sample on day  $i$ ,  $p$  is the average infectiousness of a single spore in that host-parasite combination (as calculated above), and  $s_i$  describes whether the host survived until day  $i$  (1) or not (0). While the lifetime transmission success is a measure of the basic reproduction number  $R_0$ , which describes parasite fitness under stable endemic conditions, the asymptotic growth rate is a measure of the net population growth rate, which describes fitness under epidemic conditions (Frank 1996, Hethcote 2000); we included both measures because either situation can occur in the field. We compared the two measures across host-parasite combinations using non-parametric Kruskal-Wallis tests with Dunn's post hoc testing (R package PMCMR, Pohlert 2014). *A. parthenogenetica* exposed to low and high spore doses of *E. artemiae* were treated separately.
